# Supplementary material for: Palladium catalyzed synthesis of highly substituted naphthalenes via direct ring construction from amides with alkynes
Source: Royal Society of Chemistry journal article supplement (doi:10.1039/c0cc01448f), 2010-01-01
Supplement: c0cc01448f.pdf [file c0cc01448f.pdf]

**Palladium catalyzed synthesis of naphthalene derivatives via direct  
fuse ring construction from amides with alkynes**

Junliang Wu, Xiuling Cui\*, Xia Mi, Ying Li and Yangjie Wu\*

*Henan Key Laboratory of Chemical Biology and Organic Chemistry, Key Laboratory of Applied Chemistry of*

*Henan Universities, Department of Chemistry, Zhengzhou University, Zhengzhou, 450052, P. R. China*

Supporting information

Table of contents

|                                                                   |        |
|-------------------------------------------------------------------|--------|
| Experimental Procedures and Spectra Data.....                     | S2~10  |
| Normalized absorption and fluorescence spectra of <b>3j</b> ..... | S11    |
| <sup>1</sup> H NMR, <sup>13</sup> C NMR and IR Spectra.....       | S12~26 |
| X-ray Crystallographic Data of compound <b>3c</b> .....           | S27~29 |

## General Information

All reagents were used directly without further purification. Silica gel was purchased from Qing Dao Hai Yang Chemical Industry Co.  $^1\text{H}$  NMR and  $^{13}\text{C}$  NMR spectra were recorded on a Bruker DPX-400 spectrometer. Mass spectra were obtained on a Waters Q-ToF MicroTM spectrometer. IR spectra were recorded on a Bruker VECTOR22 spectrometer. Fluorescence spectra were recorded on a Jobin Yvon Fluoroma-P fluorescence spectrometer in the solid state, slit width 1nm.

## Reaction procedure:

**Optimization Study for ring construction of acetanilide (1a) with diphenylacetylene (2a) via C-H bonds cleavage (Table S1).** Pd catalyst (1~10 mol %), oxidant (1~2 equiv) and acetanilide (40.5 mg, 0.3mmol, 1 equiv) were weighed into the flask, diphenylacetylene (112.14mg, 0.63mmol, 2.1 equiv) was added followed by solvent (1.5 mL) and additive (0.15 mmol, 0.5 equiv). The resulting mixture was stirred at the indicated temperature for 16 h in an oil bath at air atmosphere. The reaction was cooled to room temperature, filtered through a short Silica gel column washing with EtOAc (50 mL). The filtrate was concentrated, and evaporated to dryness under high vacuum. The yield of desired product was determined by HPLC ( $\text{C}_{18}$  column, methanol/ $\text{H}_2\text{O}$ =80/20, 1.0mL/min,  $\lambda$  =242nm).

**Table S1.** Optimization Screen for ring construction of acetanilide (1a) with diphenylacetylene (2a) via C-H bonds cleavage<sup>a</sup>

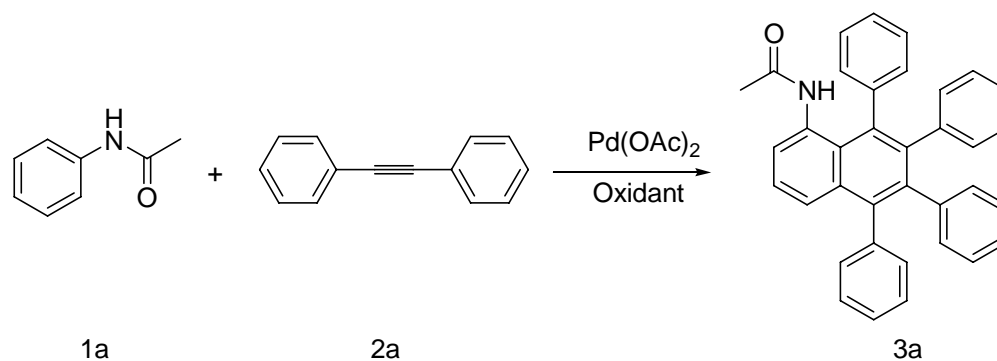

| Entry | Pd catalyst               | Solvent                | Oxidant | Additive | Temp.(°C) | Yield (%) <sup>b</sup> |
|-------|---------------------------|------------------------|---------|----------|-----------|------------------------|
| 1     | $\text{Pd}(\text{OAc})_2$ | DMSO                   | BQ      | TsOH     | 80        | 3                      |
| 2     | $\text{Pd}(\text{OAc})_2$ | $\text{CH}_3\text{CN}$ | BQ      | TsOH     | 80        | 15                     |
| 3     | $\text{Pd}(\text{OAc})_2$ | EtOH                   | BQ      | TsOH     | 80        | 58                     |
| 4     | $\text{Pd}(\text{OAc})_2$ | HOAc                   | BQ      | TsOH     | 80        | 58                     |
| 5     | $\text{Pd}(\text{OAc})_2$ | DMF                    | BQ      | TsOH     | 80        | 36                     |
| 6     | $\text{Pd}(\text{OAc})_2$ | NMP                    | BQ      | TsOH     | 80        | 38                     |
| 7     | $\text{Pd}(\text{OAc})_2$ | Dioxane                | BQ      | TsOH     | 80        | 39                     |

|    |                                                    |                                 |                                              |                                |     |        |
|----|----------------------------------------------------|---------------------------------|----------------------------------------------|--------------------------------|-----|--------|
| 8  | Pd(OAc) <sub>2</sub>                               | DCE                             | BQ                                           | TsOH                           | 80  | 52     |
| 9  | Pd(OAc) <sub>2</sub>                               | THF                             | BQ                                           | TsOH                           | 80  | 65     |
| 10 | Pd(OAc) <sub>2</sub>                               | CHCl <sub>3</sub>               | BQ                                           | TsOH                           | 80  | 71     |
| 11 | Pd(OAc) <sub>2</sub>                               | CH <sub>2</sub> Cl <sub>2</sub> | BQ                                           | TsOH                           | 80  | 53     |
| 12 | Pd(OAc) <sub>2</sub>                               | Toluene                         | BQ                                           | TsOH                           | 80  | 82(78) |
| 13 | -                                                  | Toluene                         | BQ                                           | TsOH                           | 80  | No     |
| 14 | Pd(OAc) <sub>2</sub>                               | Toluene/HOAc                    | BQ                                           | TsOH                           | 80  | 66     |
| 15 | Pd(OAc) <sub>2</sub>                               | Toluene/H <sub>2</sub> O        | BQ                                           | TsOH                           | 80  | 20     |
| 16 | Pd(OAc) <sub>2</sub>                               | Toluene/EtOH                    | BQ                                           | TsOH                           | 80  | 68     |
| 17 | Pd(OAc) <sub>2</sub>                               | Toluene                         | -                                            | TsOH                           | 80  | 28     |
| 18 | Pd(OAc) <sub>2</sub>                               | Toluene                         | H <sub>2</sub> O <sub>2</sub>                | TsOH                           | 80  | 21     |
| 19 | Pd(OAc) <sub>2</sub>                               | Toluene                         | Cu(OAc) <sub>2</sub>                         | TsOH                           | 80  | 13     |
| 20 | Pd(OAc) <sub>2</sub>                               | Toluene                         | Ag <sub>2</sub> O                            | TsOH                           | 80  | trace  |
| 21 | Pd(OAc) <sub>2</sub>                               | Toluene                         | Oxone                                        | TsOH                           | 80  | 80     |
| 22 | Pd(OAc) <sub>2</sub>                               | Toluene                         | AgI                                          | TsOH                           | 80  | trace  |
| 23 | Pd(OAc) <sub>2</sub>                               | Toluene                         | K <sub>2</sub> S <sub>2</sub> O <sub>8</sub> | TsOH                           | 80  | 83(80) |
| 24 | Pd(OAc) <sub>2</sub>                               | Toluene                         | K <sub>2</sub> S <sub>2</sub> O <sub>8</sub> | TFA                            | 80  | 10     |
| 25 | Pd(OAc) <sub>2</sub>                               | Toluene                         | K <sub>2</sub> S <sub>2</sub> O <sub>8</sub> | TfOH                           | 80  | 71     |
| 26 | Pd(OAc) <sub>2</sub>                               | Toluene                         | K <sub>2</sub> S <sub>2</sub> O <sub>8</sub> | H <sub>2</sub> SO <sub>4</sub> | 80  | 84     |
| 27 | Pd(OAc) <sub>2</sub>                               | Toluene                         | K <sub>2</sub> S <sub>2</sub> O <sub>8</sub> | TsOH                           | 60  | 65     |
| 28 | Pd(OAc) <sub>2</sub>                               | Toluene                         | K <sub>2</sub> S <sub>2</sub> O <sub>8</sub> | TsOH                           | 70  | 79     |
| 29 | Pd(OAc) <sub>2</sub>                               | Toluene                         | K <sub>2</sub> S <sub>2</sub> O <sub>8</sub> | TsOH                           | 100 | 83     |
| 30 | Pd(OAc) <sub>2</sub> <sup>c</sup>                  | Toluene                         | K <sub>2</sub> S <sub>2</sub> O <sub>8</sub> | TsOH                           | 80  | 84     |
| 31 | PdCl <sub>2</sub>                                  | Toluene                         | K <sub>2</sub> S <sub>2</sub> O <sub>8</sub> | TsOH                           | 80  | 34     |
| 32 | Pd(PPh <sub>3</sub> ) <sub>2</sub> Cl <sub>2</sub> | Toluene                         | K <sub>2</sub> S <sub>2</sub> O <sub>8</sub> | TsOH                           | 80  | 31     |
| 33 | Pd <sub>2</sub> (dba) <sub>3</sub> <sup>d</sup>    | Toluene                         | K <sub>2</sub> S <sub>2</sub> O <sub>8</sub> | TsOH                           | 80  | 80     |
| 34 | Pd(PPh <sub>3</sub> ) <sub>4</sub>                 | Toluene                         | K <sub>2</sub> S <sub>2</sub> O <sub>8</sub> | TsOH                           | 80  | 74     |
| 35 | Pd(CF <sub>3</sub> COO) <sub>2</sub>               | Toluene                         | K <sub>2</sub> S <sub>2</sub> O <sub>8</sub> | TsOH                           | 80  | 79     |

*a* Reaction conditions: **1a** (0.3 mmol), **2a** (0.63 mmol), Pd-catalyst (5 mol%), additives(0.15mmol), oxidant (0.6mmol), solvent (1.5 mL), 16 h. *b* Yield determined by HPLC analysis and based on the amount of **1a** used. Value in parentheses indicates yield after purification. *c* 10 mol % of Pd(OAc)<sub>2</sub> was used. *d* 2.5 mol % of Pd<sub>2</sub>(dba)<sub>3</sub> was used.

### **General catalytic procedure (Table 2)**

Pd(OAc)<sub>2</sub> (3.36 mg, 0.015mmol, 5%mol), K<sub>2</sub>S<sub>2</sub>O<sub>8</sub> (162.2mg, 0.60mmol, 2equiv), and anilide (0.3mmol, 1 equiv) were weighed into the flask, alkynes (0.63mmol, 2.1 equiv) was added followed by toluene (1.5 mL) and TsOH (25.8mg, 0.15 mmol, 0.5 equiv). The resulting mixture was stirred at the indicated temperature for 16 h in an oil bath at air atmosphere, then cooled down to room temperature. The mixture was diluted with 30 mL saturated NaHCO<sub>3</sub> and extracted with ether (3\*20 mL). The combined organic phase was dried over Na<sub>2</sub>SO<sub>4</sub>. After evaporation of the solvents the residue was purified by silica gel

chromatography or thin layer chromatography (TLC) (elute: hexane-EtOAc).

### 5, 6, 7, 8-tetraphenyl-N-acetyl-1-aminonaphthalene 3a

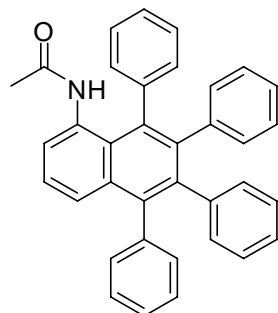

3a

Pale yellow solid;  $^1\text{H}$  NMR (400 MHz,  $\text{CDCl}_3$ ) ppm: 7.95 (d,  $J=7.45\text{Hz}$ , 1H), 7.50 (dd,  $J_1=7.74\text{Hz}$ ,  $J_2=0.61\text{Hz}$ , 1H), 7.40 (t,  $J=7.66\text{Hz}$ , 1H), 7.26~7.17 (m, 10H), 6.99(s, 1H, N-H), 6.85~6.73 (m, 10H), 1.40 (s, 3H).  $^{13}\text{C}$  NMR (100MHz,  $\text{CDCl}_3$ ): 168.11, 142.21, 140.95, 140.13, 139.94, 139.66, 139.41, 138.84, 133.77, 132.97, 131.12, 131.08, 131.05, 131.00, 130.99, 130.96, 130.49, 128.21, 127.52, 127.04, 126.52, 126.45, 126.40, 125.78, 125.37, 125.28, 124.32, 123.33, 23.94. HRMS (ESI) Calcd. for  $\text{C}_{36}\text{H}_{27}\text{NO}$ :  $[\text{M}+\text{Na}]^+$ , 512.1990. Found:  $m/z$  512.1987.

### 4-mehtyl-5, 6, 7, 8-tetraphenyl-N-acetyl-1-aminonaphthalene 3b

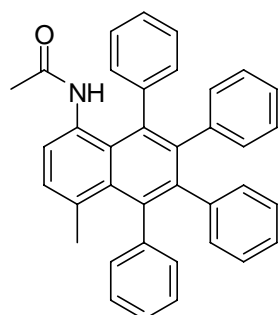

3b

Pale yellow solid;  $^1\text{H}$  NMR (400 MHz,  $\text{CDCl}_3$ ) ppm: 7.72 (d,  $J=7.71\text{Hz}$ , 1H), 7.26 (d,  $J=5.62\text{Hz}$ , 1H), 7.23~7.06 (m, 10H), 6.81~6.78 (m, 6H), 6.74 (s, 1H, N-H), 6.67~6.64 (m, 4H), 1.88 (s, 3H), 1.38 (s, 3H).  $^{13}\text{C}$  NMR (100MHz,  $\text{CDCl}_3$ ): 168.15, 142.65, 142.51, 140.25, 140.07, 139.90, 138.63, 134.75, 134.08, 132.97, 131.56, 131.24, 131.14, 131.07, 130.38, 130.26, 128.15, 126.91, 126.72, 126.54, 126.36, 126.31, 126.19, 125.11, 125.03, 123.88, 25.30, 23.74. HRMS (ESI) Calcd. for  $\text{C}_{37}\text{H}_{29}\text{NO}$ :  $[\text{M}+\text{Na}]^+$ , 526.2147. Found:  $m/z$  526.2148.

### 3-mehtyl-5, 6, 7, 8-tetraphenyl-N-acetyl-1-aminonaphthalene 3c

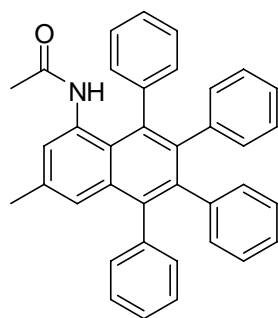

3c

Pale yellow solid;  $^1\text{H}$  NMR (400 MHz,  $\text{CDCl}_3$ ) ppm: 7.84(d,  $J=1.05\text{Hz}$ , 1H), 7.28~7.17 (m, 11H), 6.97 (s, 1H, N-H), 6.84~6.73 (m, 10H), 2.38(s, 3H), 1.40 (s, 3H).  $^{13}\text{C}$  NMR (100MHz,  $\text{CDCl}_3$ ): 168.13, 142.27, 140.32, 140.06, 140.02, 139.82, 138.91, 128.72, 135.67, 134.30, 133.89, 132.76, 131.22, 131.18, 130.99, 130.95, 130.50, 128.19, 127.52, 127.00, 126.55, 126.50, 126.45, 126.39, 126.36, 125.31, 125.22, 124.50, 122.62, 24.00, 21.80. IR (KBr): 3426, 3055, 3025, 2922, 2851, 1671, 1622, 1542, 1494, 1465, 1441, 1404, 1369, 1279, 734,  $701\text{cm}^{-1}$ . HRMS (ESI) Calcd. for  $\text{C}_{37}\text{H}_{29}\text{NO}$ :  $[\text{M}+\text{Na}]^+$ , 526.2147. Found:  $m/z$  526.2146.

### 2, 3-dimethyl-5, 6, 7, 8-tetraphenyl-N-acetyl-1-aminonaphthalene 3d

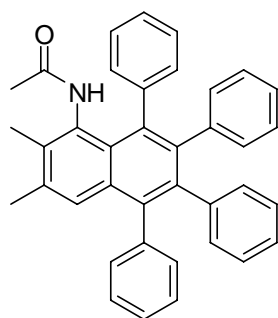

3d

Pale yellow solid;  $^1\text{H}$  NMR (400 MHz,  $\text{CDCl}_3$ ) ppm: 7.42 (s, 1H), 7.25~7.11 (m, 10H), 6.78~6.75 (m, 10H), 6.39 (s, 1H, N-H), 2.32(s, 3H), 2.17 (s, 3H), 1.38 (s, 3H).  $^{13}\text{C}$  NMR (100MHz,  $\text{CDCl}_3$ ): 168.50, 143.60, 140.37, 140.29, 140.23, 138.17, 138.12, 135.71, 135.53, 134.48, 131.70, 131.26, 131.22, 131.16, 131.10, 131.06, 131.03, 130.92, 130.89, 130.76, 129.58, 128.15, 128.10, 128.04, 127.29, 127.09, 126.51, 126.25, 126.18, 126.13, 126.06, 125.96, 125.92, 125.01, 124.83, 22.86, 21.27, 15.42. HRMS (ESI) Calcd. for  $\text{C}_{38}\text{H}_{31}\text{NO}$ :  $[\text{M}+\text{Na}]^+$ , 540.2303. Found:  $m/z$  540.2302.

### 3, 4-dimethyl-5, 6, 7, 8-tetraphenyl-N-acetyl-1-aminonaphthalene 3e

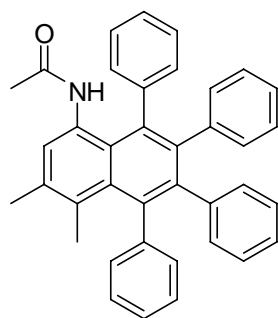

3e

Pale yellow solid;  $^1\text{H}$  NMR (400 MHz,  $\text{CDCl}_3$ ) ppm: 7.18~7.08 (m, 11H), 6.78~6.64 (m, 10H), 6.21 (s, 1H, N-H), 2.23 (s, 3H), 1.87 (s, 3H), 1.39 (s, 3H).  $^{13}\text{C}$  NMR (100MHz,  $\text{CDCl}_3$ ): 168.19, 143.89, 142.46, 140.31, 140.28, 140.22, 139.19, 138.25, 135.54, 135.12, 134.94, 133.32, 131.52, 131.41, 131.05, 130.99, 130.93, 129.80, 128.33, 127.76, 126.69, 126.13, 126.07, 126.02, 126.00, 125.97, 125.78, 124.76, 25.16, 22.87, 18.67. HRMS (ESI) Calcd. for  $\text{C}_{38}\text{H}_{31}\text{NO}$ :  $[\text{M}+\text{Na}]^+$ , 540.2303. Found:  $m/z$  540.2304.

### 5, 6, 7, 8-tetra (4-methylphenyl)-N-acetyl-1-aminonaphthalene 3f

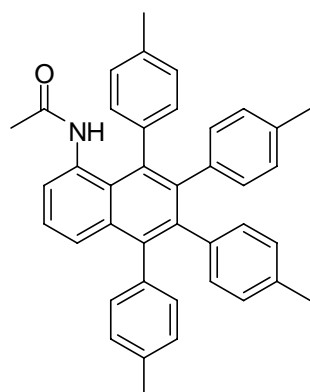

3f

Pale yellow solid;  $^1\text{H}$  NMR (400 MHz,  $\text{CDCl}_3$ ) ppm: 7.95 (d,  $J=7.21\text{Hz}$ , 1H), 7.45 (d,  $J=8.35\text{Hz}$ , 1H), 7.34 (t,  $J=7.81\text{Hz}$ , 1H), 7.12~7.03 (m, 9H), 6.64~6.59 (m, 8H), 2.30 (s, 3H), 2.29 (s, 3H), 2.07 (s, 6H), 1.40 (s, 3H).  $^{13}\text{C}$  NMR (100MHz,  $\text{CDCl}_3$ ): 167.98, 141.16, 139.31, 139.24, 139.05, 137.34, 137.09, 136.88, 136.47, 135.73, 134.36, 134.31, 134.29, 133.94, 132.97, 131.14, 130.96, 130.91, 130.75, 130.38, 128.82, 128.20, 127.20, 127.08, 125.41, 125.20, 124.32, 122.61, 23.91, 21.21, 21.09, 21.02. HRMS (ESI) Calcd. for  $\text{C}_{40}\text{H}_{35}\text{NO}$ :  $[\text{M}+\text{Na}]^+$  568.2616. Found:  $m/z$  568.2617.

### 3-methyl-5, 6, 7, 8-tetra (4-methylphenyl)-N-acetyl-1-aminonaphthalene 3g

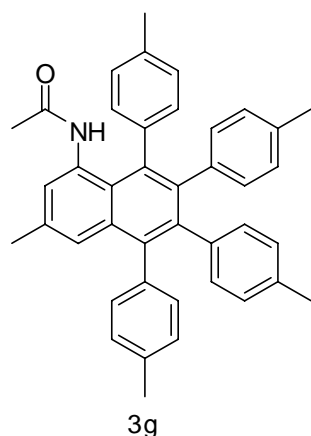

Pale yellow solid;  $^1\text{H}$  NMR (400 MHz,  $\text{CDCl}_3$ )ppm: 7.84(d,  $J=1.27\text{Hz}$ , 1H), 7.24(s, 1H), 7.11~7.03(m, 9H), 6.64~6.61(m, 8H), 2.36(s, 3H), 2.31(s, 3H), 2.29(s, 3H), 2.07(s, 6H), 1.40(s, 3H).  $^{13}\text{C}$  NMR (100MHz,  $\text{CDCl}_3$ ): 167.92, 140.21, 139.30, 139.11, 138.65, 137.53, 137.21, 137.01, 136.39, 135.59, 135.21, 134.25, , 134.21, 134.15, 134.07, 132.79, 131.01, 130.79, 130.40, 129.48, 128.79, 128.19, 127.21, 127.17, 127.06, 127.01, 126.89, 126.34, 124.50, 124.28, 122.58, 23.95, 21.77, 21.25, 21.10, 21.07, 20.99. HRMS (ESI) Calcd. for  $\text{C}_{41}\text{H}_{37}\text{NO}$ :  $[\text{M}+\text{Na}]^+$ 582.2773. Found:  $m/z$  582.2773.

### 2-methyl-5, 6, 7, 8-tetra (4-methylphenyl)-N-acetyl-1-aminonaphthalene 3h

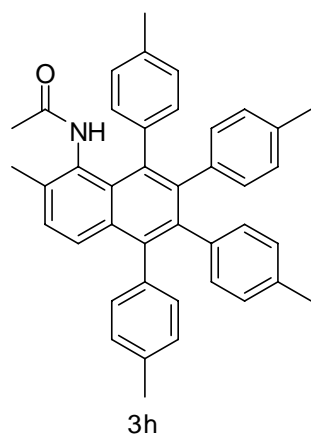

Pale yellow solid;  $^1\text{H}$  NMR (400 MHz,  $\text{CDCl}_3$ )ppm: 7.51(d,  $J=8.73\text{Hz}$ , 1H), 7.25(d,  $J=7.61\text{Hz}$ , 1H), 7.05~7.03(m, 8H), 6.63~6.58(m, 8H), 6.35(s, 1H, N-H), 2.30(s, 3H), 2.28(s, 3H), 2.25(s, 3H), 2.07(s, 6H), 1.41(s, 3H).  $^{13}\text{C}$  NMR (100MHz,  $\text{CDCl}_3$ ): 168.14, 141.57, 140.76, 138.95, 138.43, 137.46, 137.37, 136.89, 135.60, 135.41, 135.36, 135.64, 134.19, 134.06, 132.58, 130.98, 130.96, 130.91, 130.80, 129.80, 128.69, 128.67, 128.64, 128.56, 128.20, 128.12, 127.20, 127.11, 126.91, 22.98, 21.21,

21.07, 21.03, 21.01, 19.23. IR (KBr): 3417, 3023, 2923, 2861, 1668, 1511, 1374, 1260, 1108, 1029, 811, 740 $\text{cm}^{-1}$ . HRMS (ESI) Calcd. for  $\text{C}_{41}\text{H}_{37}\text{NO}$ :  $[\text{M}+\text{Na}]^+$  582.2773. Found:  $m/z$  582.2774.

**5, 6, 7, 8-tetra (4-trifluoromethylphenyl)-N-acetyl-1-aminonaphthalene 3i**

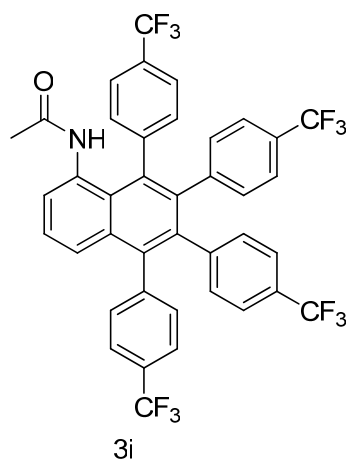

Pale yellow solid;  $^1\text{H}$  NMR (400 MHz,  $\text{CDCl}_3$ )ppm: 7.78 (d,  $J=6.88\text{Hz}$ , 1H), 7.55~7.46(m, 6H), 7.35~7.30(m, 4H), 7.15 (t,  $J=7.24\text{Hz}$ , 4H), 6.89(d,  $J=7.92\text{Hz}$ , 2H), 6.84(d,  $J=7.96\text{Hz}$ , 2H), 6.49(s, 1H, N-H), 1.39(s, 3H).  $^{13}\text{C}$  NMR (100MHz,  $\text{CDCl}_3$ ): 168.33, 145.42, 142.72, 142.66, 142.45, 139.05, 138.74, 137.06, 134.26, 133.61, 132.62, 131.19, 131.13, 130.94, 130.49, 129.68, 129.65, 129.35, 129.33, 128.68, 128.63, 128.35, 128.31, 127.06, 126.91, 126.16, 125.92, 125.26, 125.02~124.90(m), 124.17~124.06 (p,  $J=3.6\text{Hz}$ ), 124.00~123.89 (p,  $J=3.7\text{Hz}$ ), 122.55, 122.32, 122.29, 23.26. HRMS (ESI) Calcd. for  $\text{C}_{40}\text{H}_{23}\text{F}_{12}\text{NO}$ :  $[\text{M}+\text{Na}]^+$  784.1486. Found:  $m/z$  784.1486.

**4-methyl-5, 6, 7, 8-tetra (4-trifluoromethylphenyl)-N-acetyl-1-aminonaphthalene**

**3j**



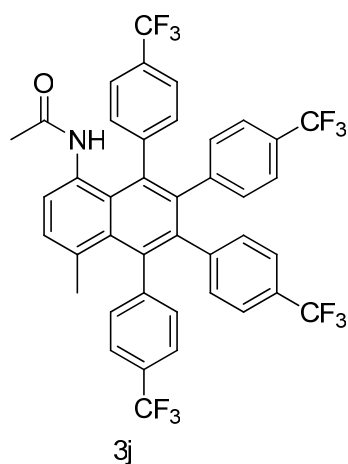

Pale yellow solid; <sup>1</sup>H NMR (400 MHz, CDCl<sub>3</sub>)ppm: 7.57(d, J=7.66Hz, 1H), 7.47(d, J=8.11Hz, 2H), 7.40(d, J=8.09Hz, 2H), 7.35(d, J=7.72Hz, 1H), 7.26(m, 2H), 7.20(d, J=8.01Hz, 2H), 7.11 (d, J=7.13Hz, 4H), 6.76(d, J=7.24Hz, 4H), 6.37(s, 1H, N-H), 1.89(s, 3H), 1.37(s, 3H). <sup>13</sup>C NMR (100MHz, CDCl<sub>3</sub>): 168.28, 145.85, 145.47, 142.99, 142.84, 138.16, 137.94, 134.92, 134.65, 132.80, 131.53, 131.45, 131.14, 131.10, 131.03, 130.38, 129.34, 129.01, 128.68, 128.49, 128.42, 128.17, 128.10, 127.96, 127.77, 126.99, 125.24, 125.06~124.89 (m), 124.31~124.21 (q, J=36.), 123.95~123.81 (p, J=3.8), 122.53, 122.36, 122.32, 25.61, 23.11. IR (KBr): 3445, 3042, 3021, 2931, 2855, 1664, 1616, 1522, 1405, 1328, 1169, 1126, 1069, 1020, 844, 723cm<sup>-1</sup>. HRMS (ESI) Calcd. for C<sub>41</sub>H<sub>25</sub>F<sub>12</sub>NO: [M+Na]<sup>+</sup>798.1642. Found: m/z 798.1642.

### 3-methyl-5, 6, 7, 8-tetra (4-trifluoromethylphenyl)-N-acetyl-1-aminonaphthalene

#### 3k

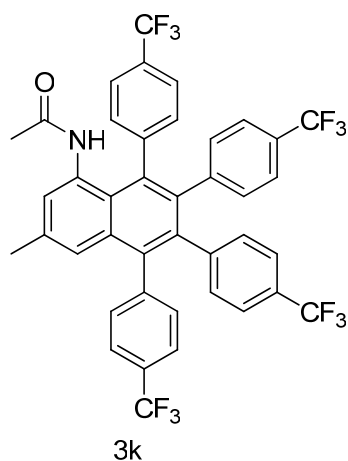

Pale yellow solid; <sup>1</sup>H NMR (400 MHz, CDCl<sub>3</sub>)ppm: 7.62(d, J=1.17Hz, 1H), 7.53(m,

4H), 7.33(d, J=7.98Hz, 2H), 7.28(d, J=8.03Hz, 2H), 7.21(s, 1H), 7.13(m, 4H), 6.87(d, J=8.10Hz, 2H), 6.82(d, J=8.00Hz, 2H), 6.41(s, 1H, N-H), 2.41(s, 3H), 1.39(s, 3H).  $^{13}\text{C}$  NMR (100MHz,  $\text{CDCl}_3$ ): 168.37, 145.54, 142.92, 142.78, 142.63, 138.07, 137.30, 137.12, 134.10, 133.75, 132.34, 131.25, 130.98, 130.50, 129.64, 129.31, 128.95, 125.28, 125.04~124.96(m), 124.12~124.08(q, J=4.0Hz), 123.96~123.93(q, J=3.8Hz), 122.34, 23.34, 21.70. HRMS (ESI) Calcd. for  $\text{C}_{41}\text{H}_{25}\text{F}_{12}\text{NO}$ :  $[\text{M}+\text{Na}]^+$  798.1642. Found: m/z 798.1641.

### 5, 6, 7, 8-tetraphenyl-N-propionyl-1-aminonaphthalene 3l

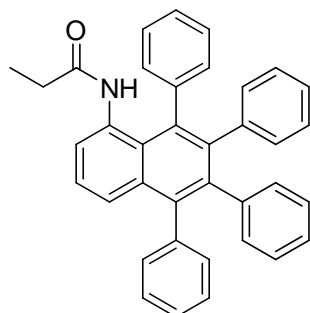

3l

Pale yellow solid;  $^1\text{H}$  NMR (400 MHz,  $\text{CDCl}_3$ )ppm: 8.01(d, J=7.45Hz, 1H), 7.48(d, J=8.29Hz, 1H), 7.39(t, J=8.30Hz, 1H), 7.25~7.16(m, 10H), 7.01(s, 1H, N-H), 6.84~6.72(m, 10H), 1.48(q, J=7.56Hz, 2H), 0.91(t, J=7.54Hz, 3H).  $^{13}\text{C}$  NMR (100MHz,  $\text{CDCl}_3$ ): 171.73, 142.20, 140.89, 14.017, 139.98, 139.71, 139.41, 138.80, 134.40, 133.79, 133.18, 131.15, 131.13, 130.97, 130.55, 128.18, 127.52, 127.04, 126.52, 126.40, 125.82, 125.37, 125.26, 125.07, 124.24, 122.94, 29.64, 9.38. HRMS (ESI) Calcd. for  $\text{C}_{37}\text{H}_{29}\text{NO}$ :  $[\text{M}+\text{Na}]^+$ , 526.2147. Found: m/z 526.2146.

Normalized absorption (purple) and fluorescence (blue) spectra of **3j** in the solid state

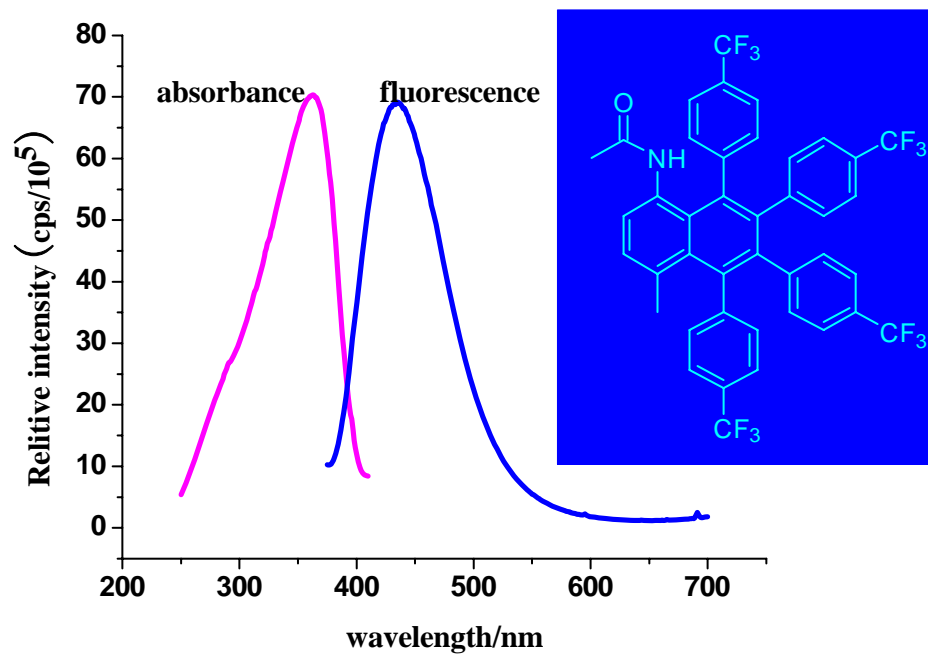

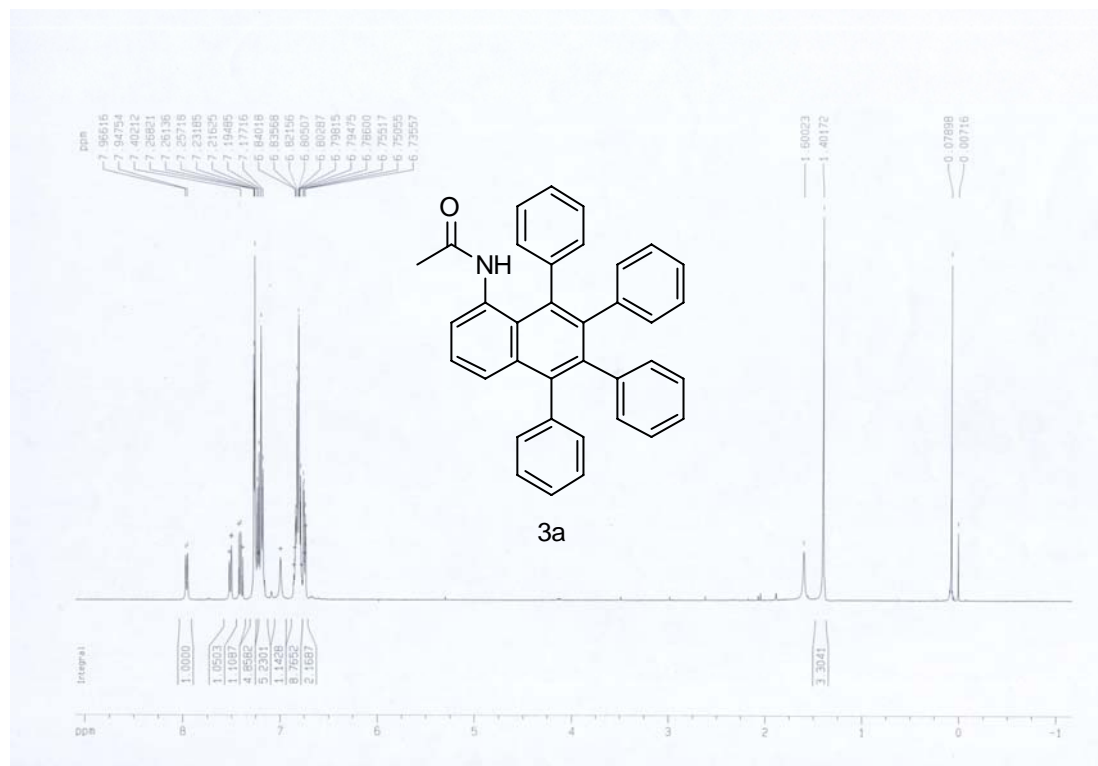

Fig. 1 <sup>1</sup>H NMR spectrum of compound **3a**

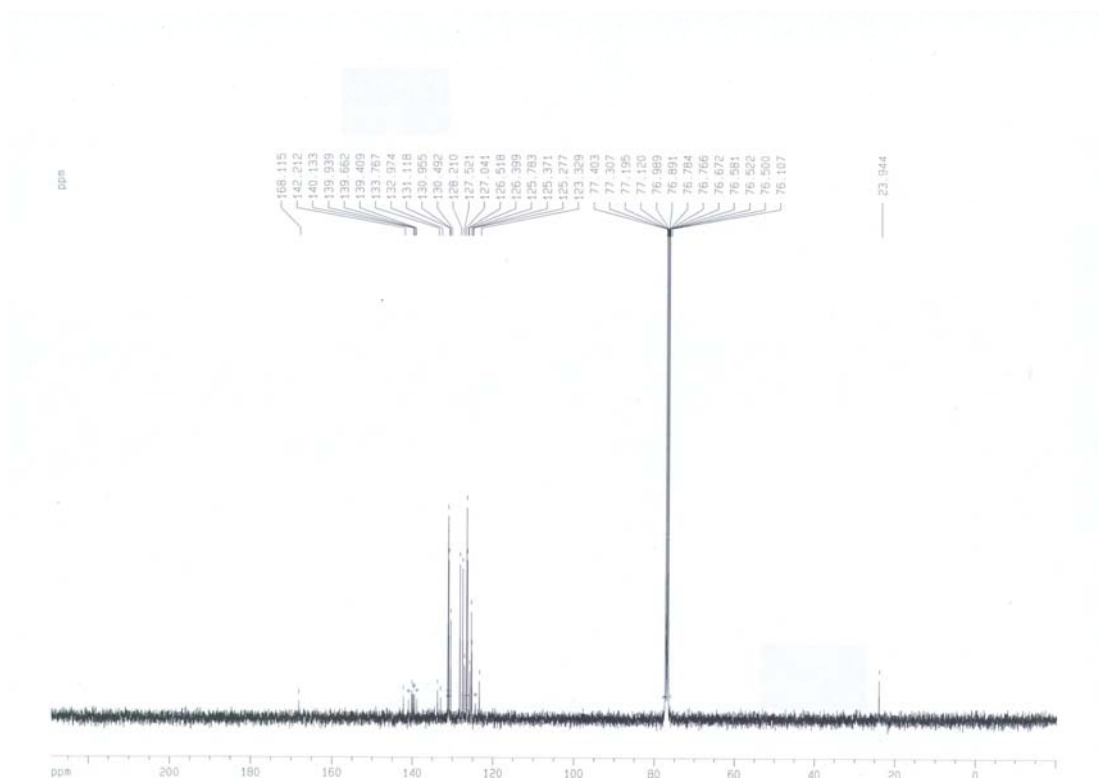

Fig. 2 <sup>13</sup>C NMR spectrum of compound **3a**

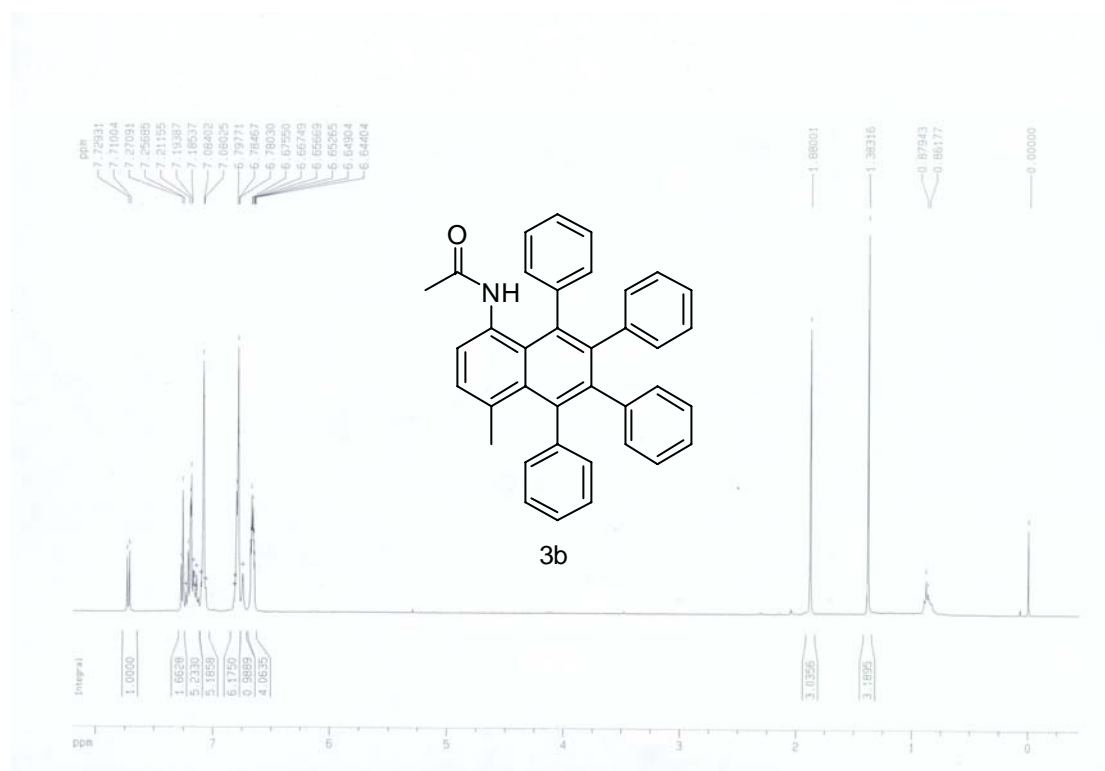

Fig. 3 <sup>1</sup>H NMR spectrum of compound **3b**

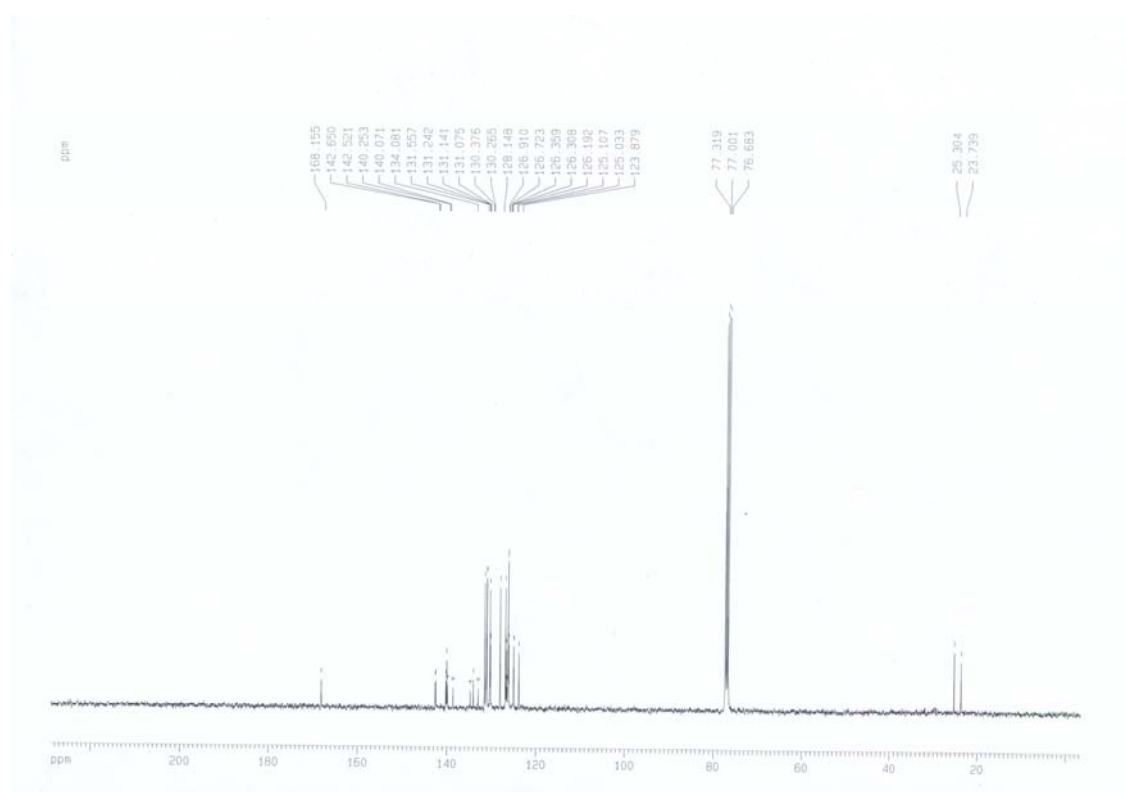

Fig. 4 <sup>13</sup>C NMR spectrum of compound **3b**

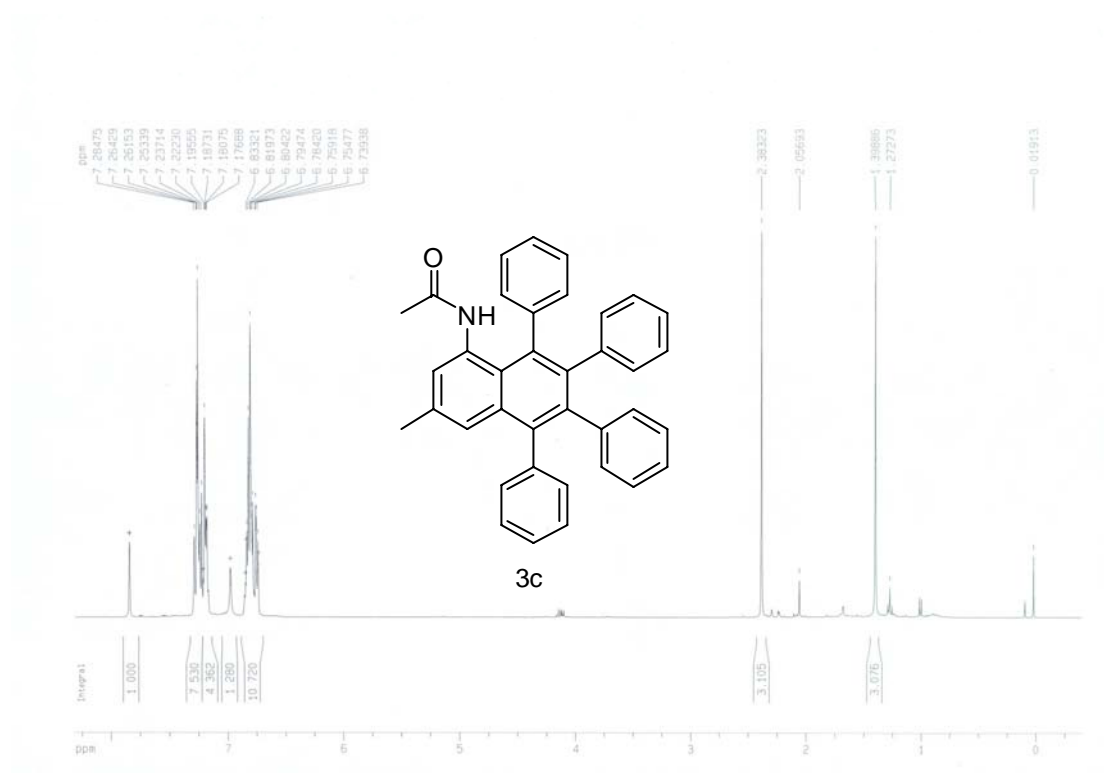

Fig. 5 <sup>1</sup>H NMR spectrum of compound **3c**

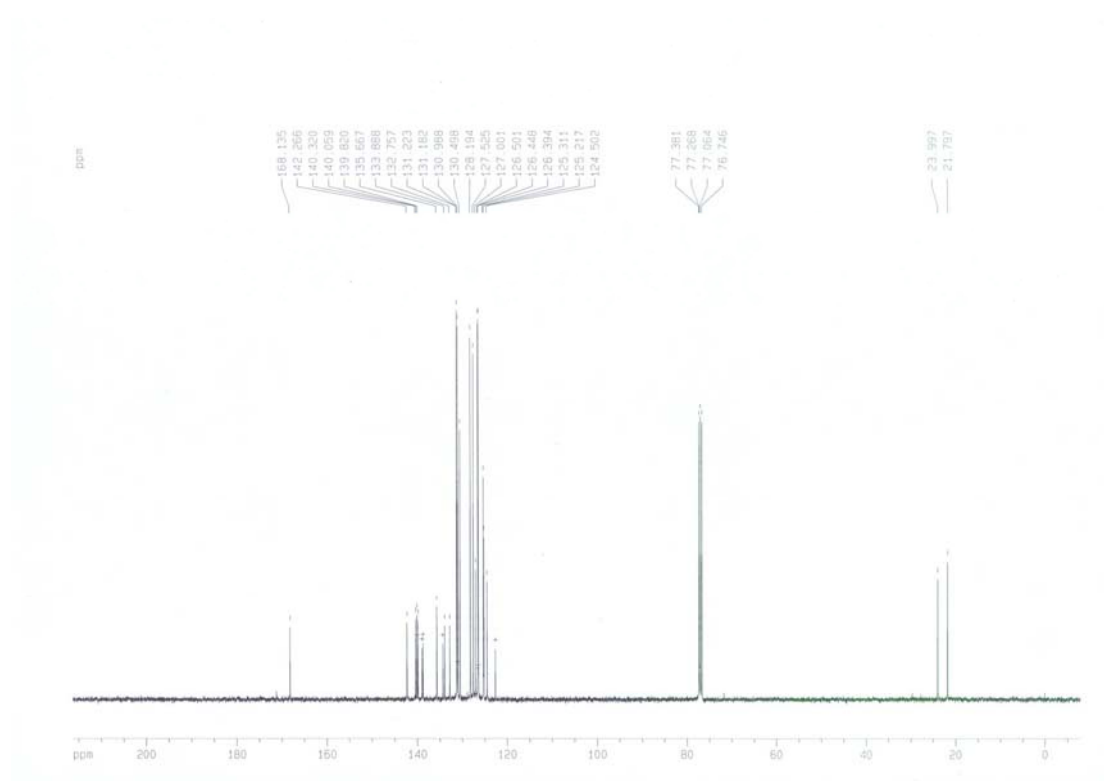

Fig. 6 <sup>13</sup>C NMR spectrum of compound **3c**

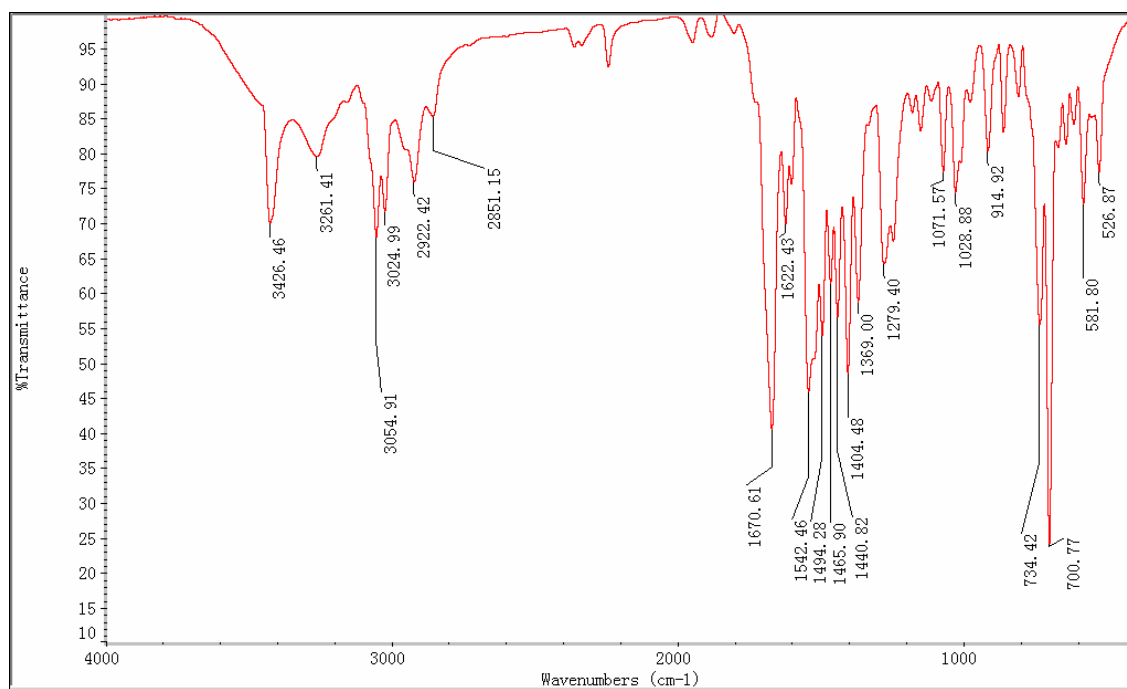

Fig. 7 IR spectrum of compound **3c**

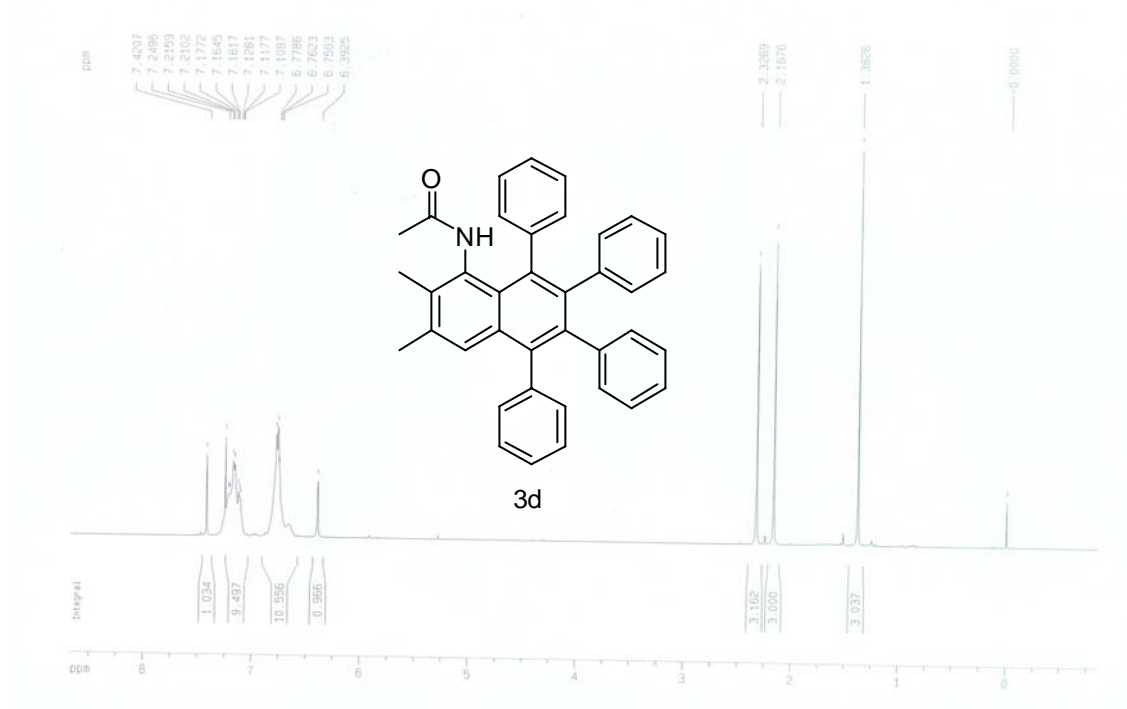

Fig. 8 <sup>1</sup>H NMR spectrum of compound **3d**

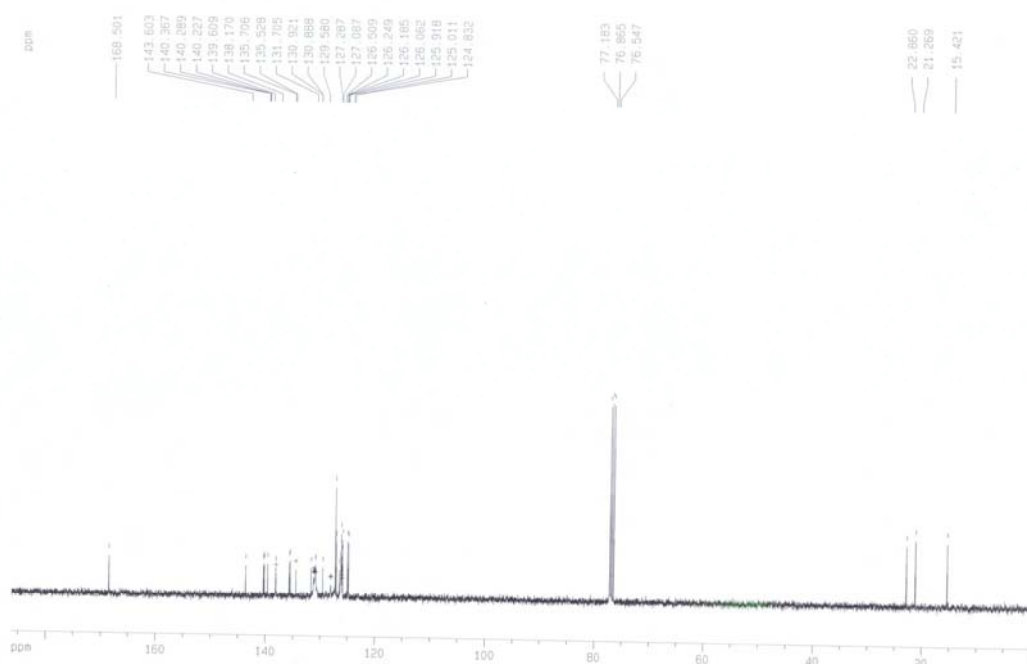

Fig. 9 <sup>13</sup>C NMR spectrum of compound 3d

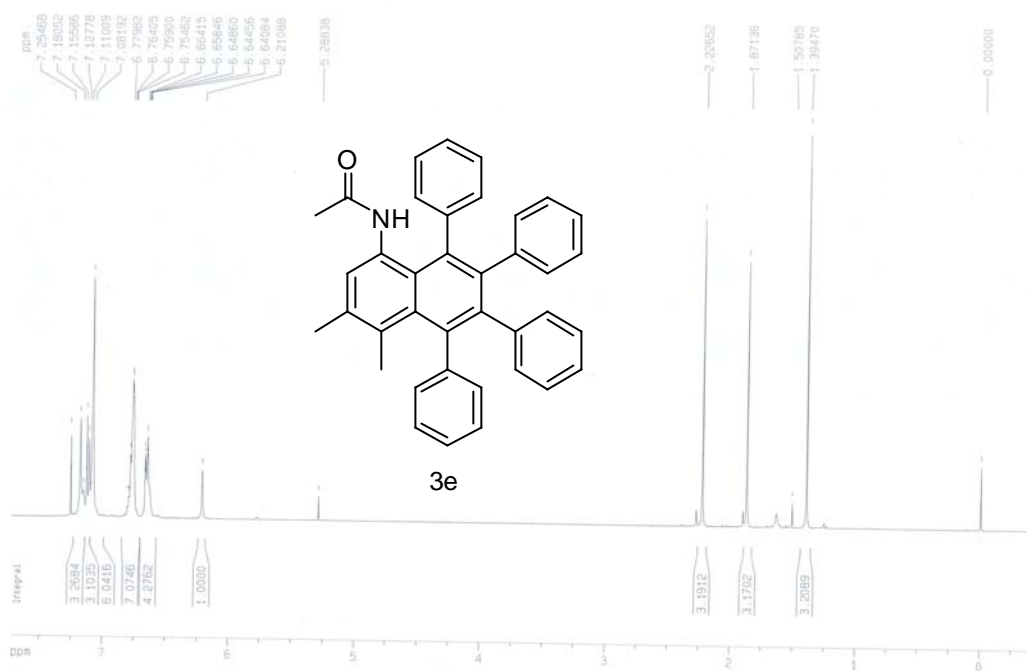

Fig. 10 <sup>1</sup>H NMR spectrum of compound 3e



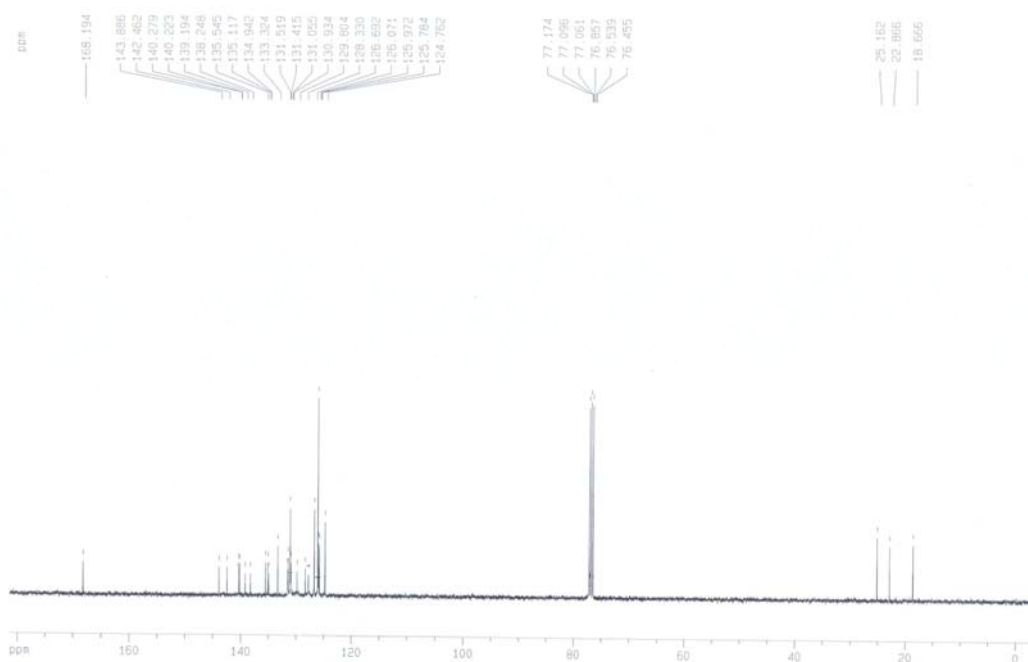

Fig. 11 <sup>13</sup>C NMR spectrum of compound 3e

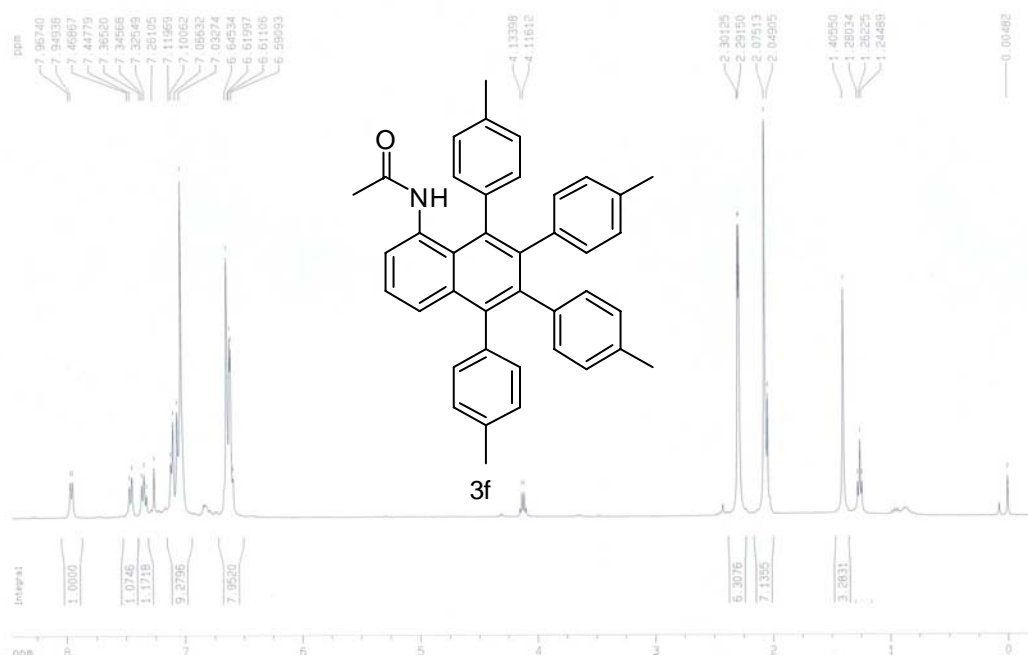

Fig. 12 <sup>1</sup>H NMR spectrum of compound 3f

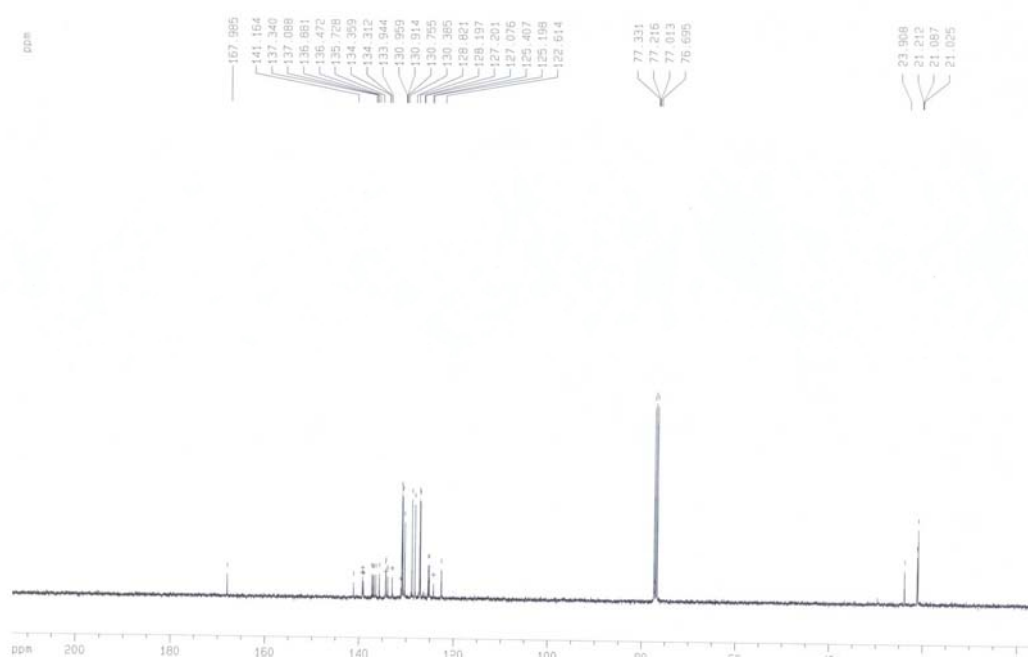

Fig. 13 <sup>13</sup>C NMR spectrum of compound **3f**

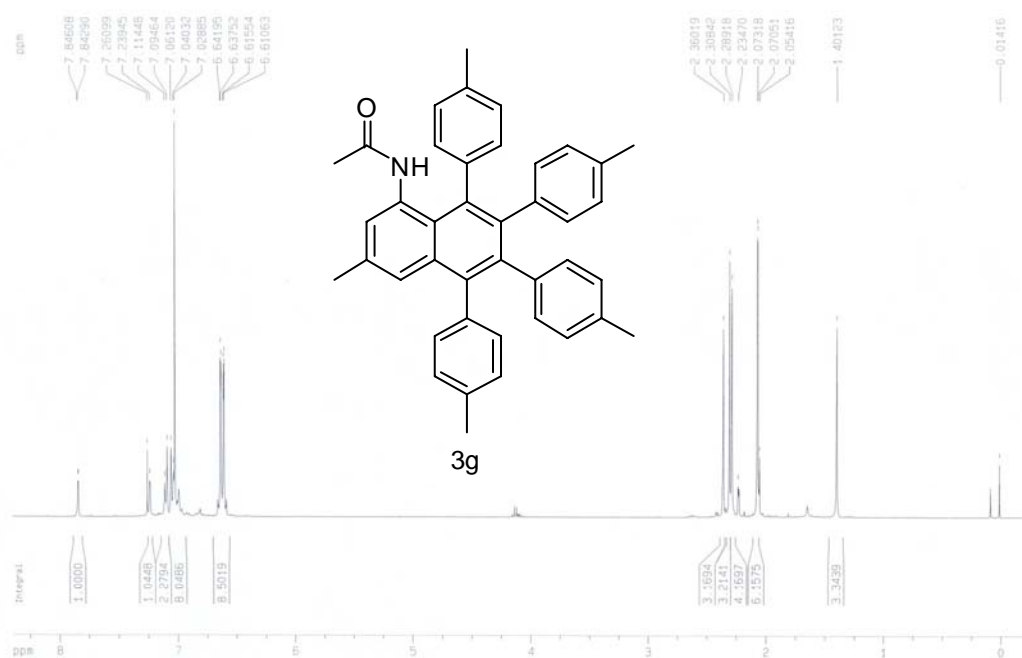

Fig. 14 <sup>1</sup>H NMR spectrum of compound **3g**

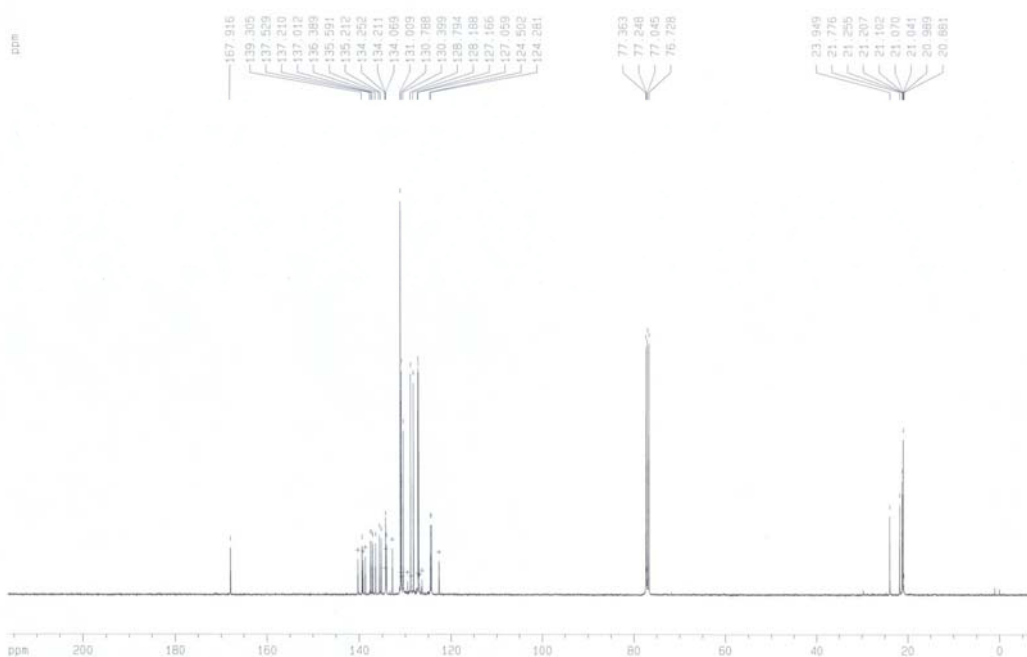

Fig. 15 <sup>13</sup>C NMR spectrum of compound **3g**

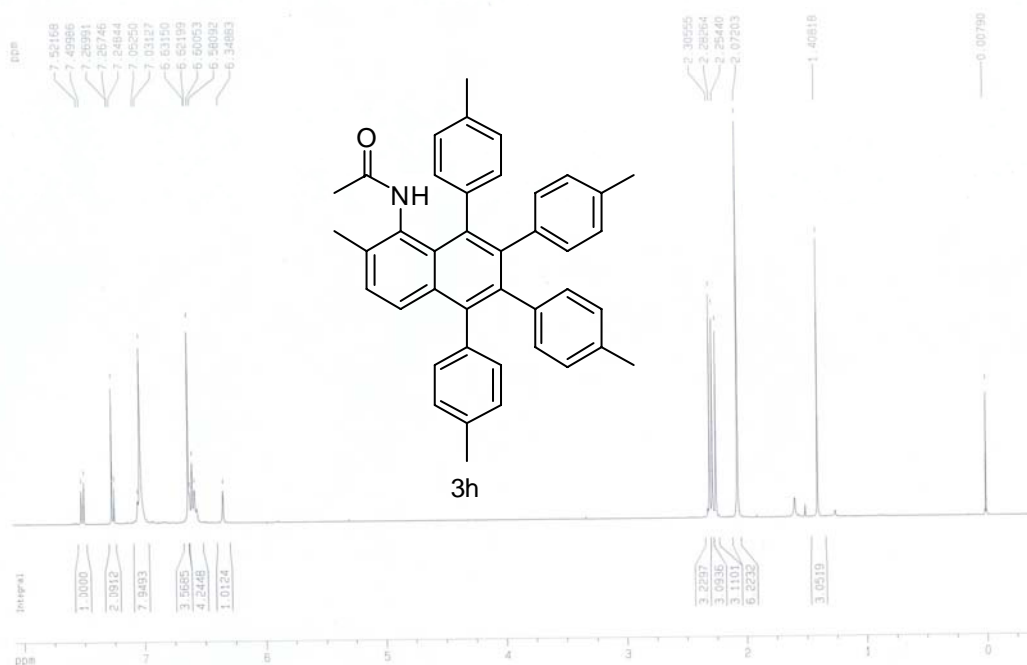

Fig. 16 <sup>1</sup>H NMR spectrum of compound **3h**

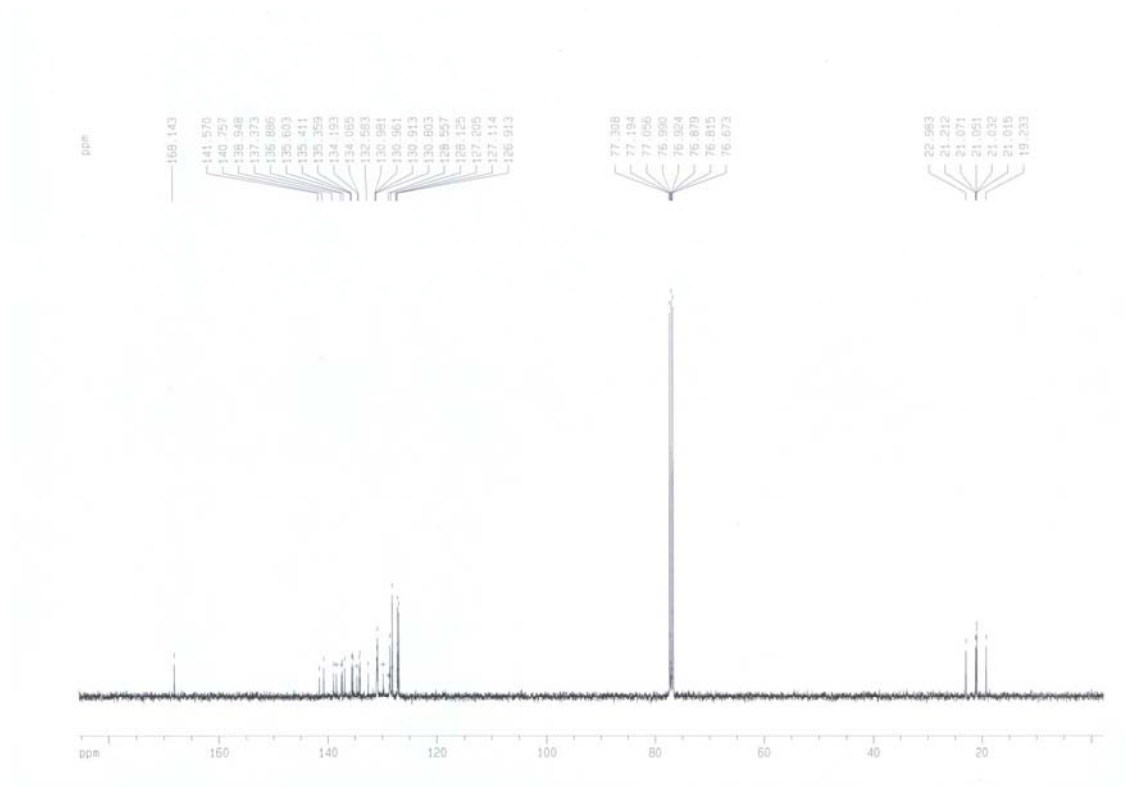

Fig. 17  $^{13}\text{C}$  NMR spectrum of compound **3h**

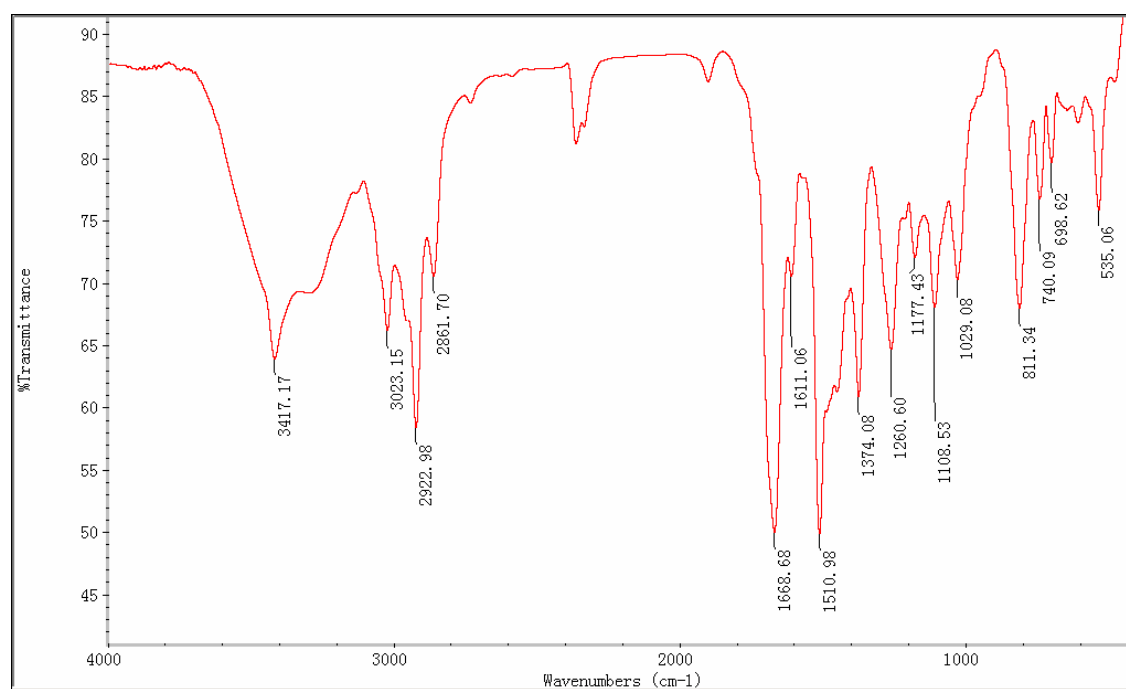

Fig. 18 IR NMR spectrum of compound **3h**

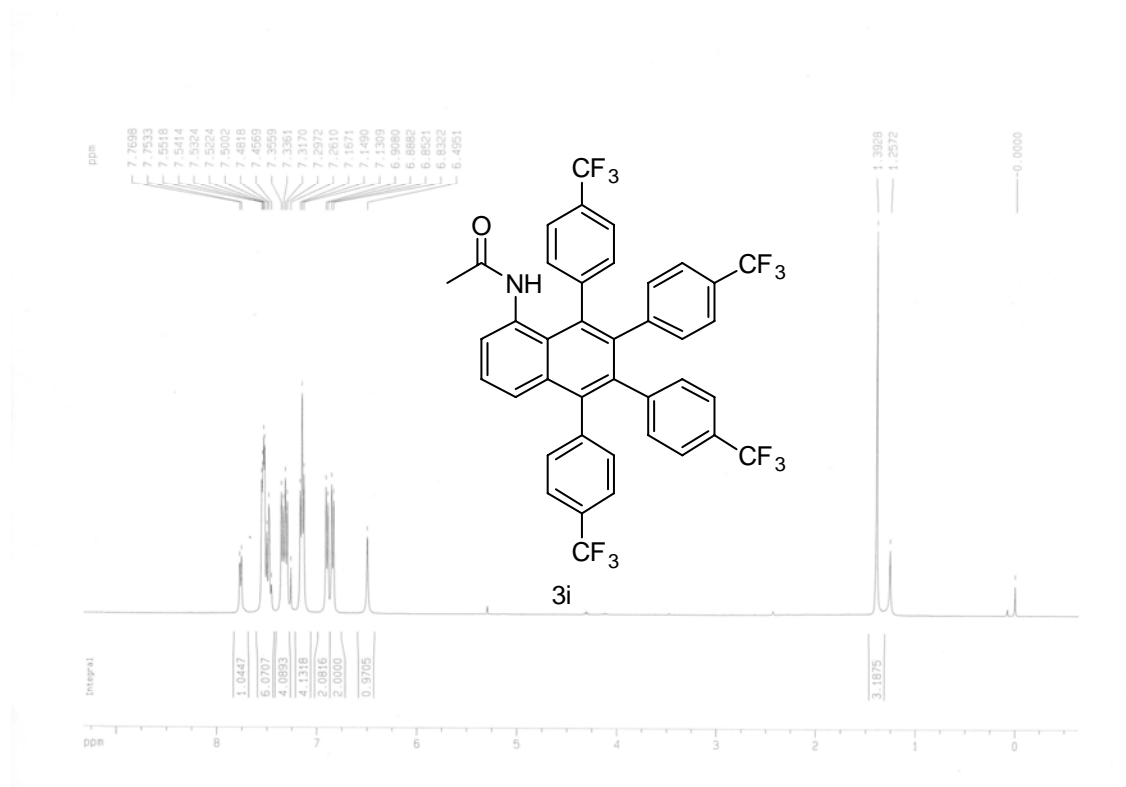

Fig. 19 <sup>1</sup>H NMR spectrum of compound **3i**

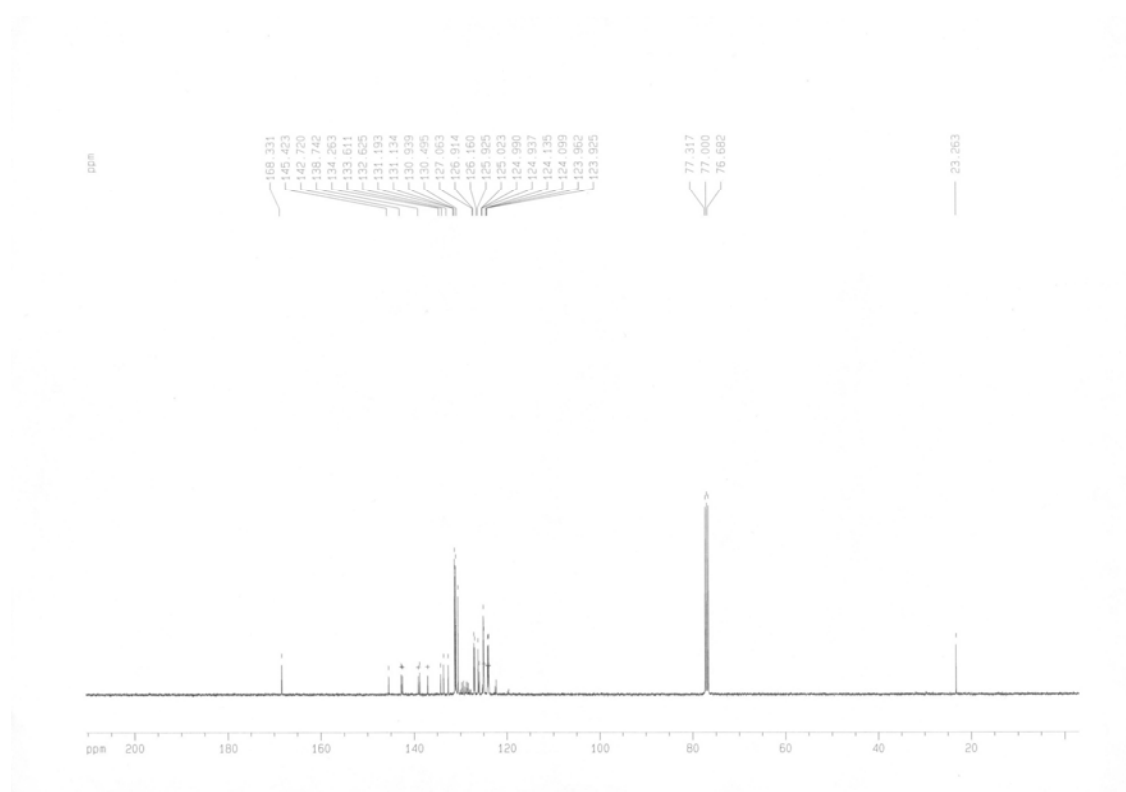

Fig. 23-a <sup>13</sup>C NMR spectrum of compound **3i**

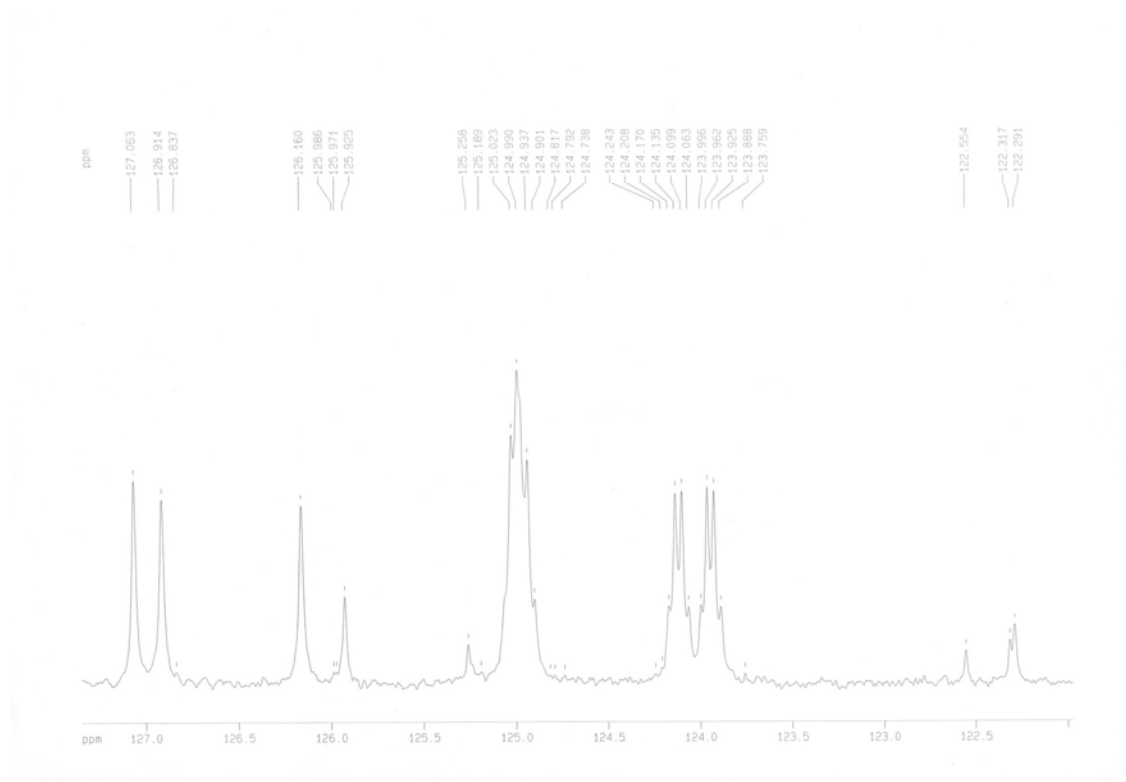

Fig. 23-b  $^{13}\text{C}$  NMR spectrum of compound **3i**

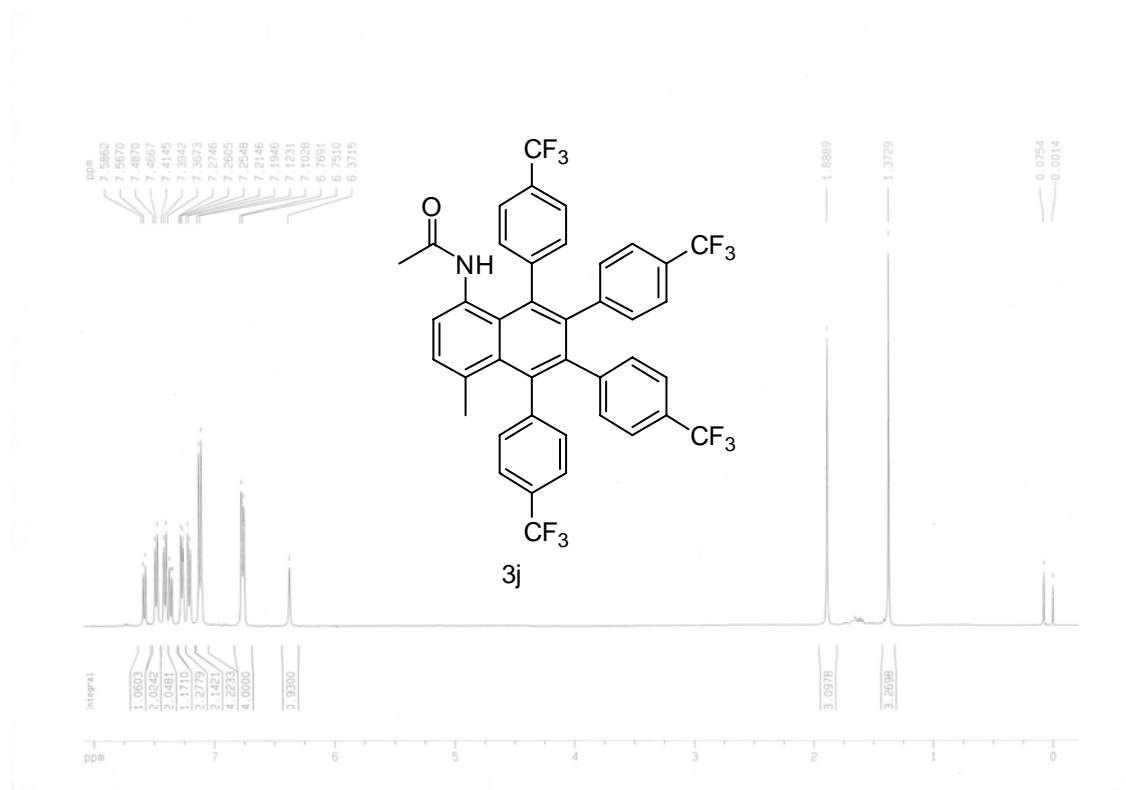

Fig. 24  $^1\text{H}$  NMR spectrum of compound **3j**

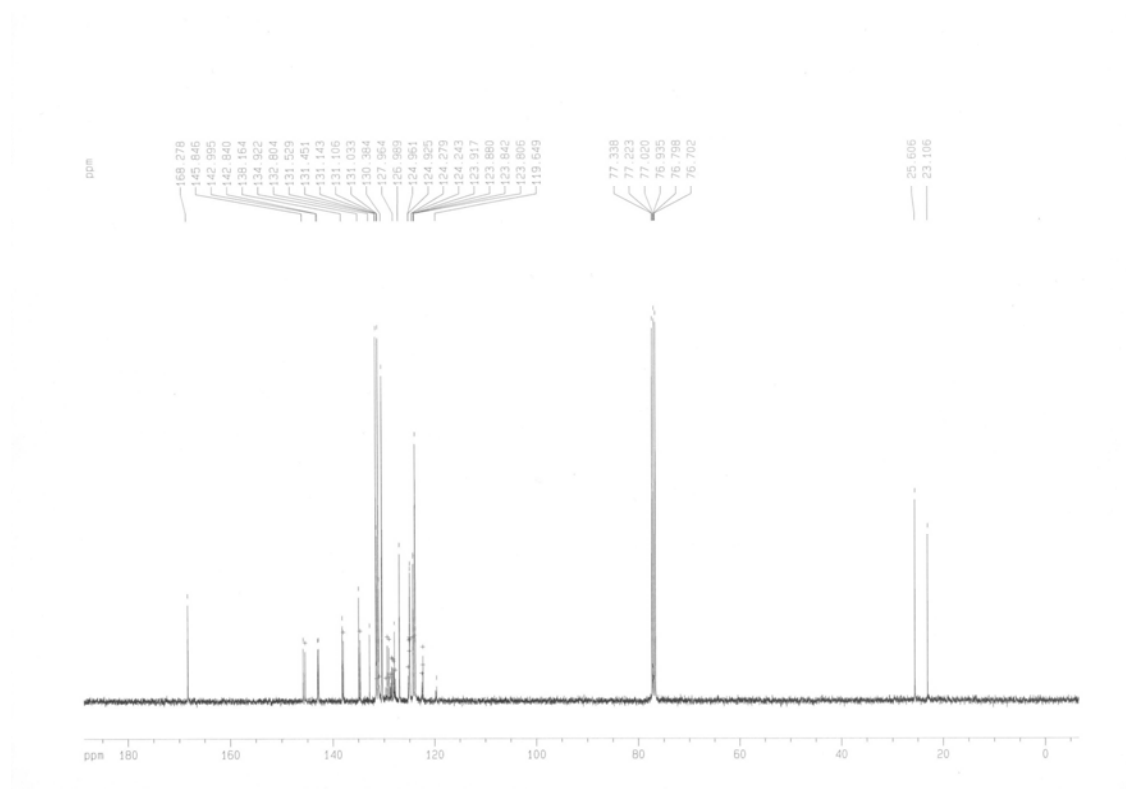

Fig. 25-a  $^{13}\text{C}$  NMR spectrum of compound **3j**

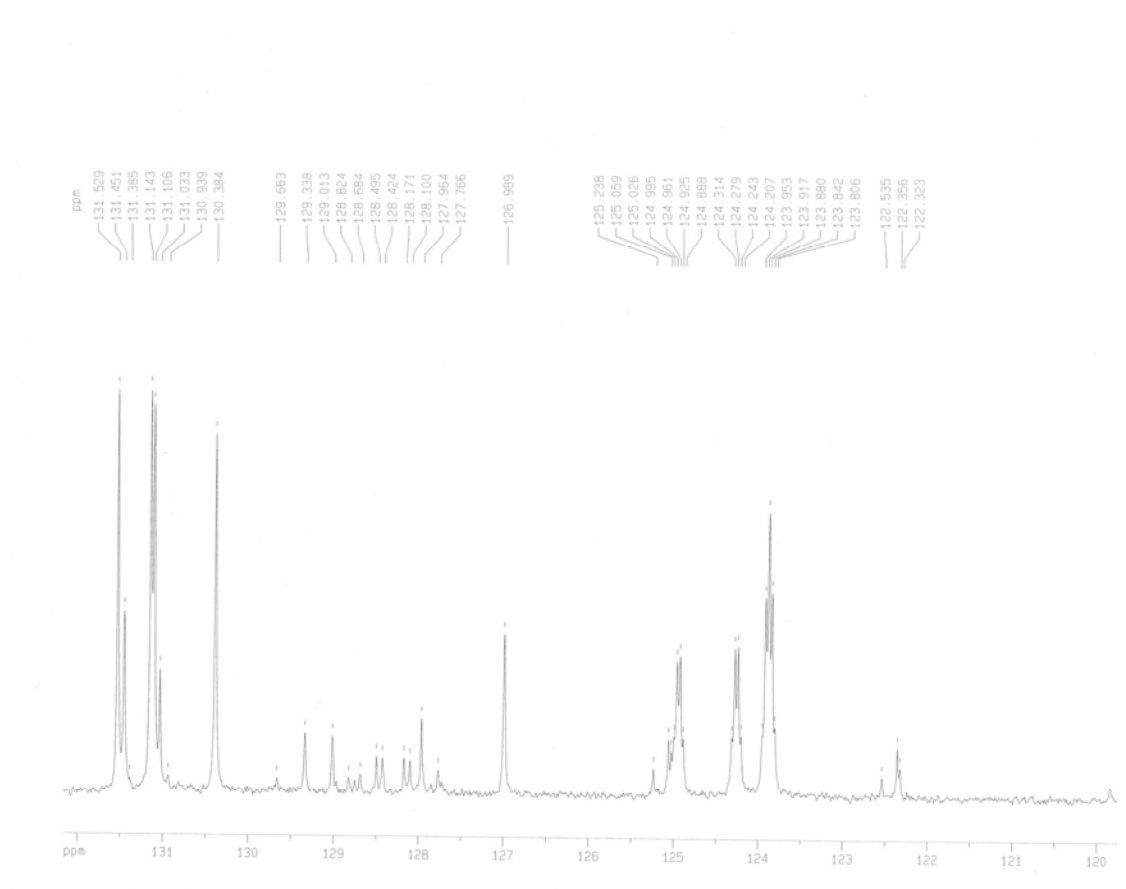

Fig. 25-b  $^{13}\text{C}$  NMR spectrum of compound **3j**

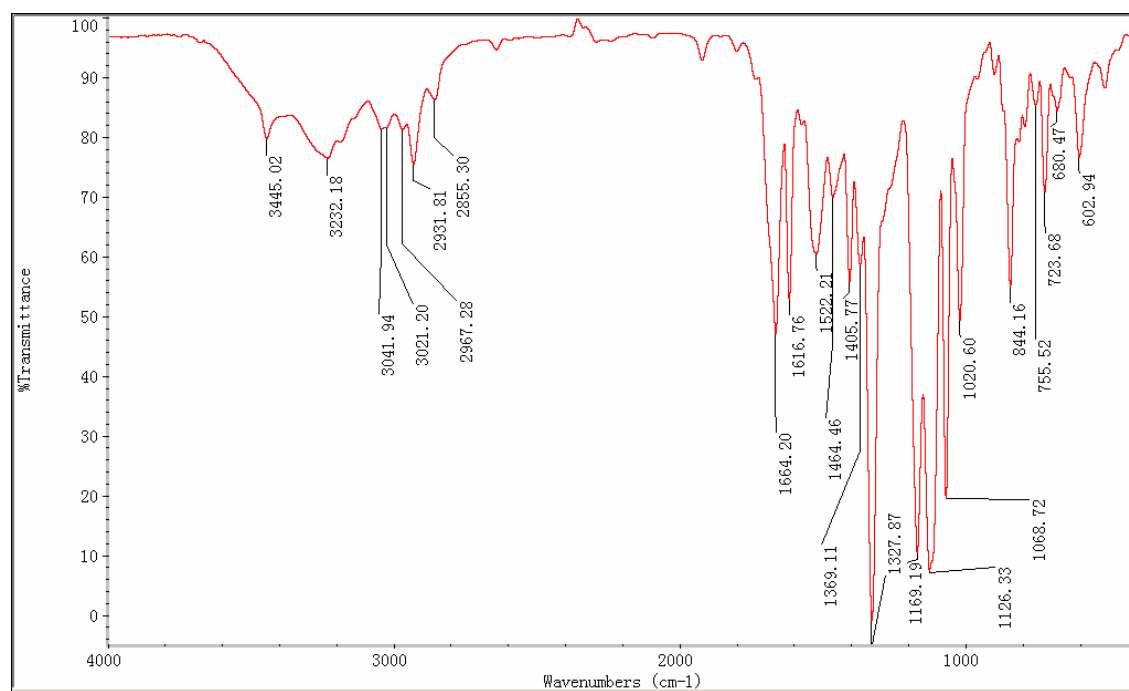

Fig. 26 IR spectrum of compound **3j**

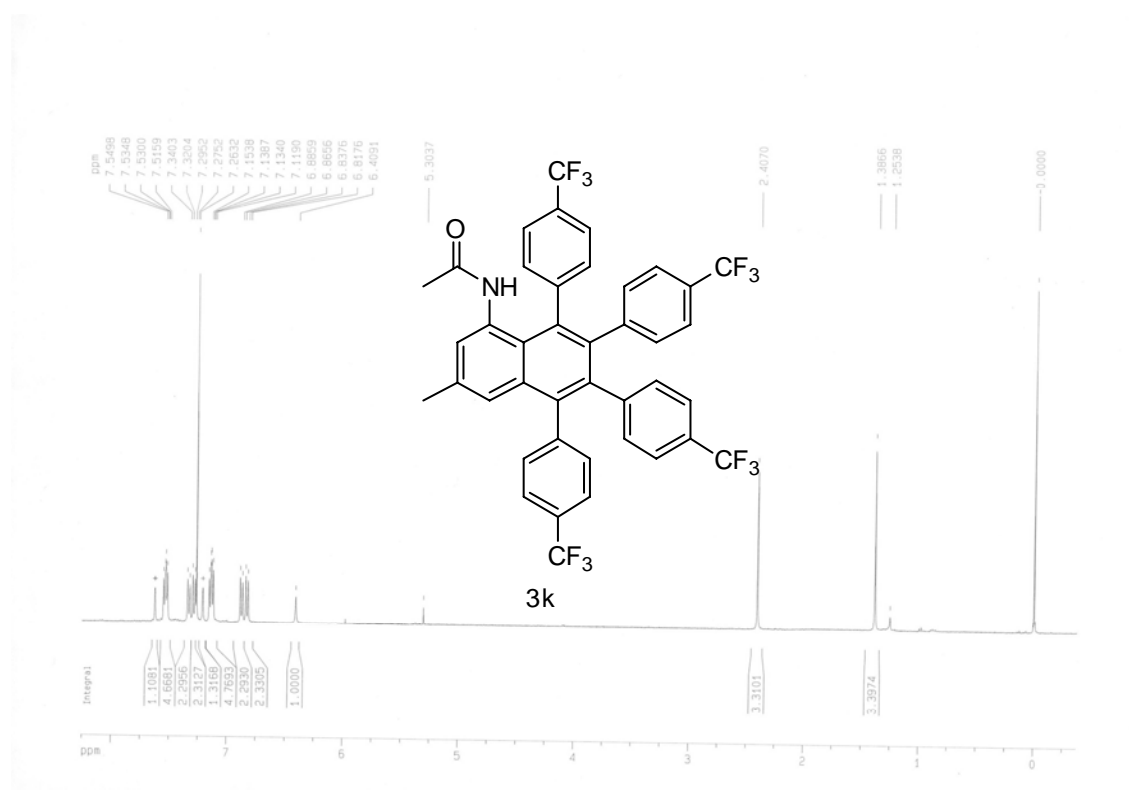

Fig. 27 <sup>1</sup>H NMR spectrum of compound **3k**



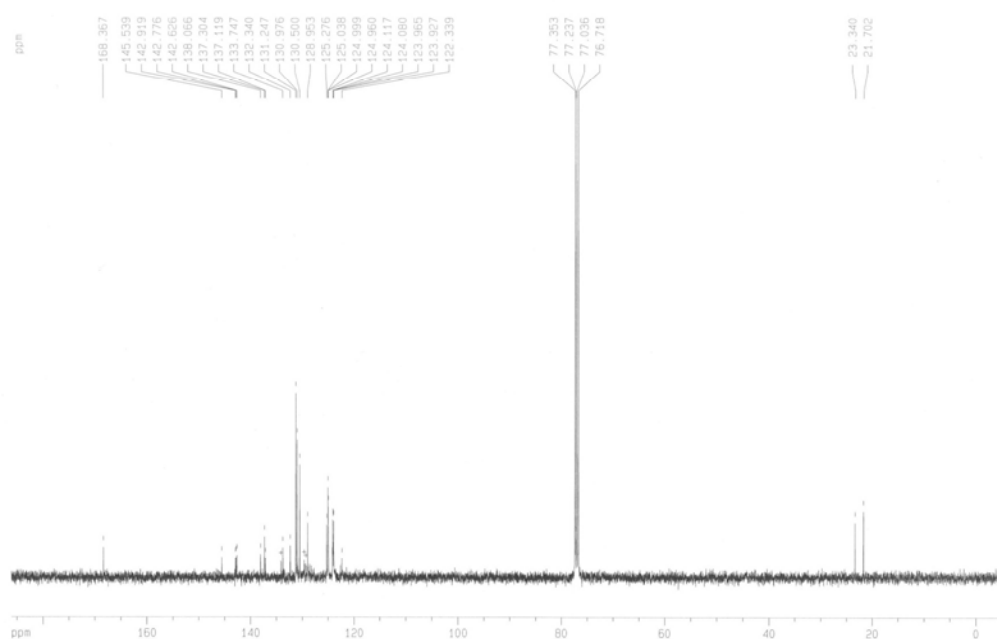

Fig. 28 <sup>13</sup>C NMR spectrum of compound **3k**

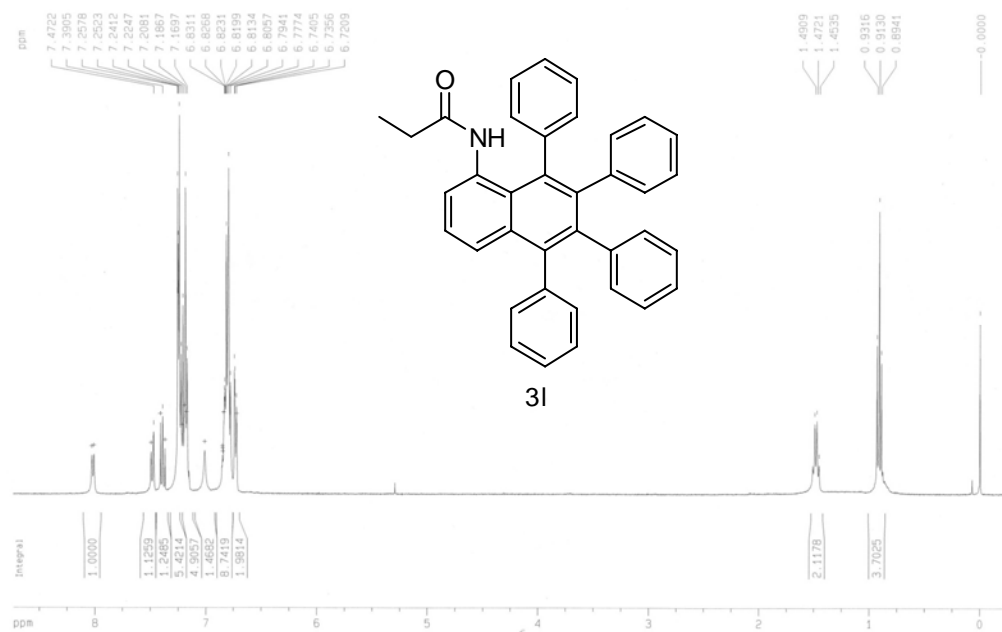

Fig. 29 <sup>1</sup>H NMR spectrum of compound **3l**

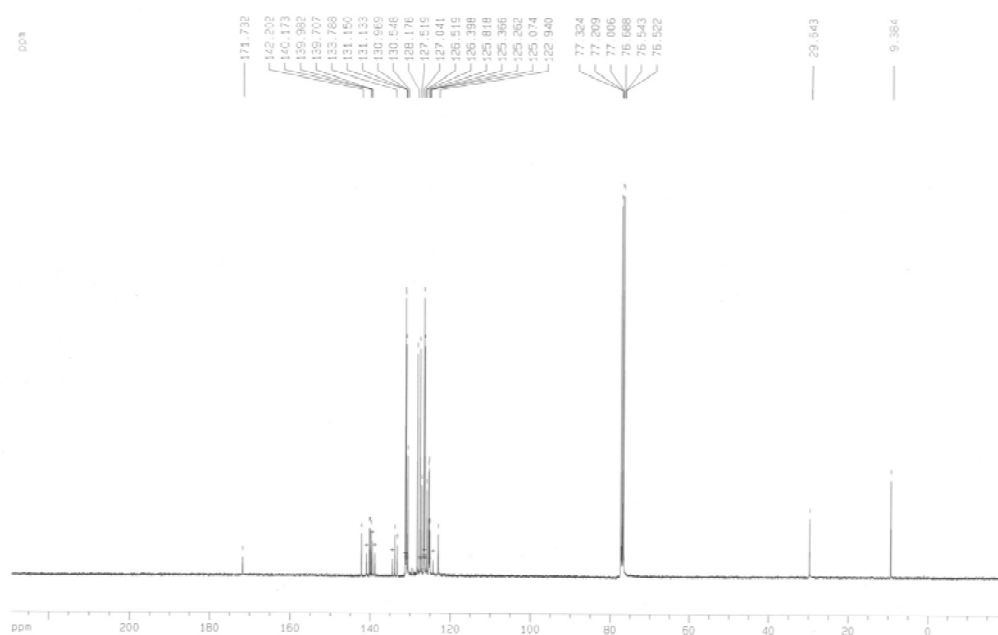

Fig. 30  $^{13}\text{C}$  NMR spectrum of compound **3I**

## X-Ray Crystallographic Data of compound 3c

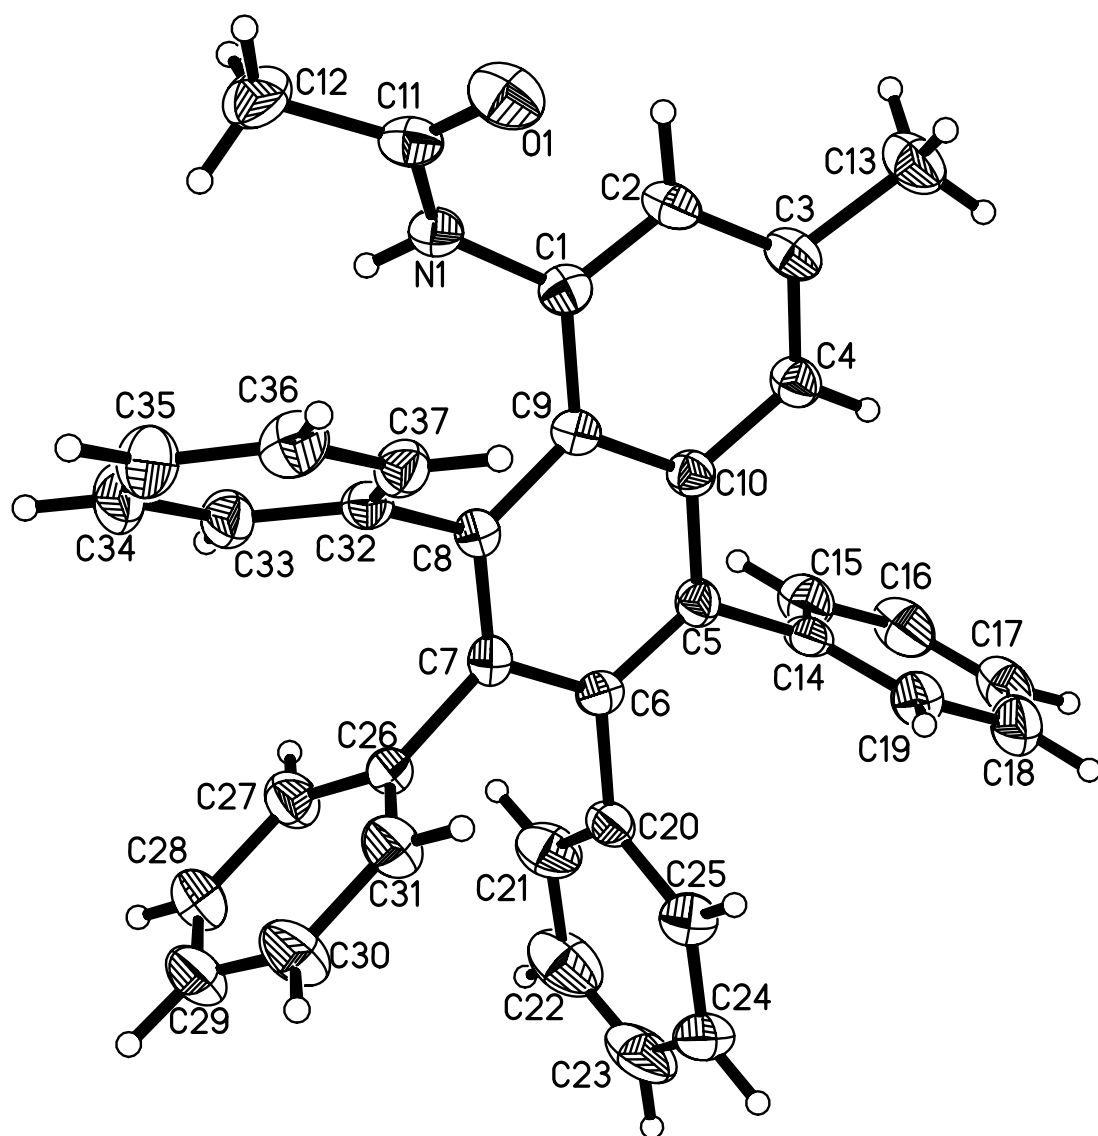

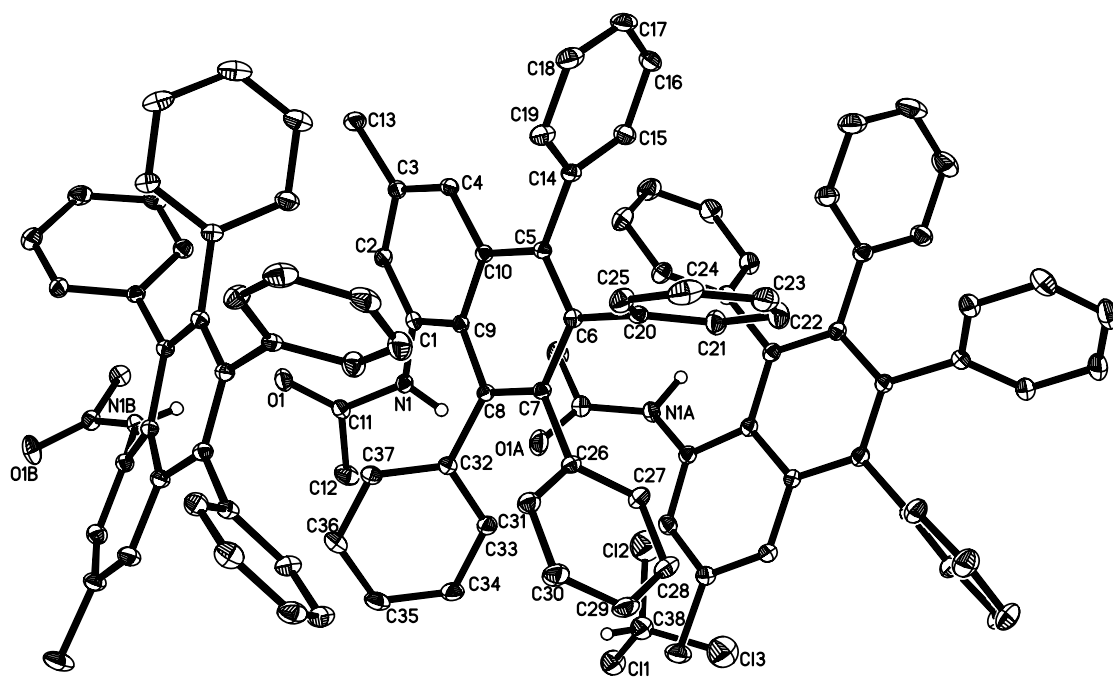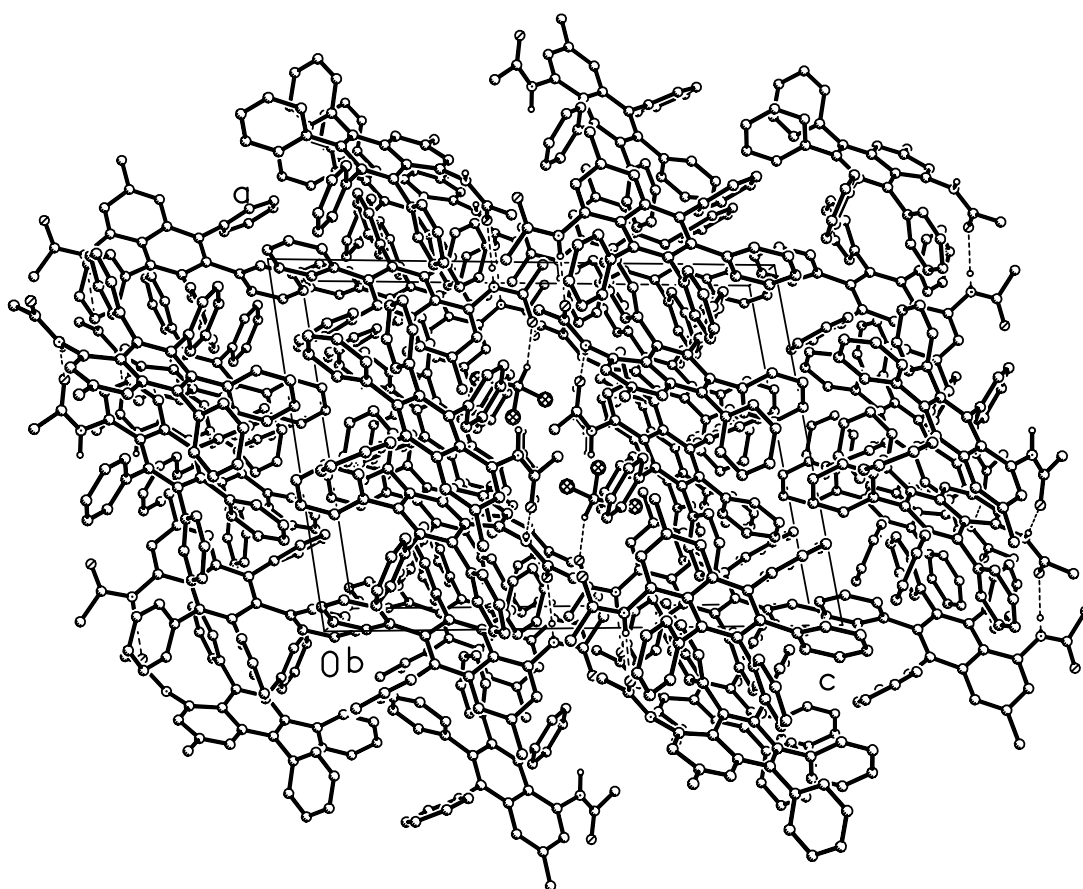

**Table S2.** Crystal data and structure refinement for compound 3c

|                                   |                                                                                                                                            |
|-----------------------------------|--------------------------------------------------------------------------------------------------------------------------------------------|
| Identification code               | compound 3c                                                                                                                                |
| Empirical formula                 | C112 H88 Cl3 N3 O3                                                                                                                         |
| Formula weight                    | 1630.20                                                                                                                                    |
| Temperature                       | 291(2) K                                                                                                                                   |
| Wavelength                        | 0.71073 Å                                                                                                                                  |
| Crystal system, space group       | Triclinic, P-1                                                                                                                             |
| Unit cell dimensions              | a = 14.7772(10) Å    alpha = 101.132(6) deg.<br>b = 15.6258(11) Å    beta = 96.957(5) deg.<br>c = 20.3531(12) Å    gamma = 102.181(6) deg. |
| Volume                            | 4442.7(5) Å <sup>3</sup>                                                                                                                   |
| Z, Calculated density             | 2, 1.219 Mg/m <sup>3</sup>                                                                                                                 |
| Absorption coefficient            | 0.159 mm <sup>-1</sup>                                                                                                                     |
| F(000)                            | 1712                                                                                                                                       |
| Crystal size                      | 0.20 x 0.20 x 0.20 mm                                                                                                                      |
| Theta range for data collection   | 3.04 to 25.00 deg.                                                                                                                         |
| Limiting indices                  | -17<=h<=17, -18<=k<=18, -24<=l<=23                                                                                                         |
| Reflections collected / unique    | 33044 / 15628 [R(int) = 0.0333]                                                                                                            |
| Completeness to theta = 25.00     | 99.8 %                                                                                                                                     |
| Absorption correction             | Semi-empirical from equivalents                                                                                                            |
| Max. and min. transmission        | 0.9689 and 0.9689                                                                                                                          |
| Refinement method                 | Full-matrix least-squares on F <sup>2</sup>                                                                                                |
| Data / restraints / parameters    | 15628 / 0 / 1088                                                                                                                           |
| Goodness-of-fit on F <sup>2</sup> | 1.050                                                                                                                                      |
| Final R indices [I>2sigma(I)]     | R1 = 0.0600, wR2 = 0.1455                                                                                                                  |
| R indices (all data)              | R1 = 0.1400, wR2 = 0.1549                                                                                                                  |
| Extinction coefficient            | 0.0013(3)                                                                                                                                  |
| Largest diff. peak and hole       | 0.724 and -0.746 e.Å <sup>-3</sup>                                                                                                         |
